# Supplementary material for: Comparative chloroplast genomics of Hibiscus (Hibisceae, Malvoideae, Malvaceae) and its phylogenetic implications
Source: Research Square preprint supplement (doi:10.21203/rs.3.rs-7085489/v1), 2025-09-05
Supplement: Supplementary file 1 [file 07573f8eeeffc1c228bba72d.xlsx]

## Sheet: Sheet1
Table S5. Comparison of simple sequence repeat types among Hibiscus species
species	Hibiscus aponeurus	Hibiscus brachysiphonius	Hibiscus burtonii	Hibiscus campanulatus	Hibiscus cannabinus	Hibiscus coatesii	Hibiscus coccineus	Hibiscus denudatus	Hibiscus fuscus	Hibiscus goldsworthii	Hibiscus hamabo	Hibiscus leptocladus	Hibiscus micranthus	Hibiscus moscheutos	Hibiscus mutabilis	Hibiscus panduriformis	Hibiscus richardsonii	Hibiscus rosa-sinensis	Hibiscus sabdariffa	Hibiscus sinosyriacus	Hibiscus sp. Gardneri	Hibiscus sturtii var. campylochlamys	Hibiscus sturtii var. platychlamys	Hibiscus syriacus	Hibiscus taiwanensis	Hibiscus tiliaceus	Hibiscus tridactylites	Hibiscus trionum	Hibiscus verdcourtii	Hibiscus volkensii
Mono	43	46	52	64	73	47	58	46	35	55	54	59	35	59	63	67	69	46	69	80	50	59	64	81	65	53	74	73	79	44
Di	5	8	5	6	17	7	8	6	5	6	12	9	5	8	12	16	12	8	13	9	6	6	5	9	12	12	12	12	15	12
Tri	3	6	3	1	6	3	6	7	4	5	3	3	4	6	4	7	8	4	9	7	3	6	6	7	4	4	8	8	4	5
Tetra	10	9	9	7	13	7	11	8	6	6	10	6	6	12	10	12	12	4	12	6	7	9	10	6	10	10	11	11	11	8
Penta	0	0	1	0	6	0	1	1	1	2	2	0	0	1	1	2	1	2	4	3	0	1	2	3	2	2	1	1	1	1
Hexa	0	0	0	0	2	0	0	1	0	0	0	0	0	1	2	0	0	2	0	0	0	0	0	0	1	0	0	0	1	0
total	61	69	70	78	117	64	84	69	51	74	81	77	50	87	92	104	102	66	107	105	66	81	87	106	94	81	106	105	111	70

## Sheet: Repeats motifs
Table S5. Repeats motifs in Hibiscus species
Hibiscus aponeurus
Repeats	3	4	5	6	7	8	9	10	11	12	13	14	15	16	17	18	19	20	total
A	-	-	-	-	-	-	-	9	7	1									17
T	-	-	-	-	-	-	-	11	12	1		1						1	26
AT	-	-	2																2
TA	-	-	2																2
TC	-	-	1																1
AAT	-	2																	2
TTA	-	1																	1
AAAT	1																		1
AGTT	1																		1
ATCA	1																		1
GAAT	1																		1
TATT	3																		3
TTAT	1																		1
TTTA	2																		2
Hibiscus brachysiphonius
Repeats	3	4	5	6	7	8	9	10	11	12	13	total
A	-	-	-	-	-	-	-	9	8	2	1	20
T	-	-	-	-	-	-	-	14	6	3	3	26
AT	-	-	3									3
TA	-	-	4									4
TC	-	-	1									1
AAT	-	1										1
ATT	-	3										3
TTA	-	2										2
AAAT	1											1
AATA	1											1
AATC	1											1
ATCA	1											1
GAAT	1											1
TATT	2											2
TTAT	2											2
Hibiscus burtonii
Repeats	3	4	5	6	7	8	9	10	11	12	13	14	15	16	17	18	19	20	21	22	23	24	total
A	-	-	-	-	-	-	-	9	8	4	2	1	1									1	26
T	-	-	-	-	-	-	-	10	5	5	4	1								1			26
AT	-	-	2																				2
TA	-	-	2																				2
TC	-	-	1																				1
AAT	-	1																					1
ATT	-	1																					1
TTA	-	1																					1
AAAT	1																						1
AATA	1																						1
AATC	1																						1
ATCA	1																						1
ATTA	1																						1
GAAT	1																						1
TATT	1																						1
TTAT	1																						1
TTTA	1																						1
AAATAT	1																						1
Hibiscus campanulatus
Repeats	3	4	5	6	7	8	9	10	11	12	13	total
A	-	-	-	-	-	-	-	15	10	3	1	29
T	-	-	-	-	-	-	-	17	11	4	3	35
AT	-	-	1									1
TA	-	-	4									4
TC	-	-	1									1
AAT	-	1										1
AAAT	1											1
AATA	1											1
AATC	1											1
ATCA	1											1
GAAT	1											1
TATT	1											1
TTAT	1											1
Hibiscus cannabinus
Repeats	3	4	5	6	7	8	9	10	11	12	13	14	15	16	17	18	19	total
A	-	-	-	-	-	-	-	19	8	3	2						3	35
T	-	-	-	-	-	-	-	12	12	10	3		1					38
AT	-	-	8	2	1	1												12
TA	-	-	3															3
TC	-	-	1															1
TG	-	-	1															1
AAT	-	1																1
ATA	-	2																2
TAA	-	1																1
TAT	-	1																1
TTA	-	1																1
AATA	2																	2
AGTT	1																	1
ATCA	1																	1
ATCT	1																	1
GAAT	1																	1
TAAA	3																	3
TATT	2																	2
TTTA	2																	2
AAGTC	1																	1
AATAT	1																	1
TAAAT	1																	1
TATTT	1																	1
TCTTT	1																	1
TGAAA	1																	1
ATAAAT	1																	1
TTTTAT	1																	1
Hibiscus Coatesii
Repeats	3	4	5	6	7	8	9	10	11	12	13	14	15	16	17	18	19	20	21	22	total
A	-	-	-	-	-	-	-	12	8	1										1	22
T	-	-	-	-	-	-	-	14	3	4	2	2									25
AT	-	-	3																		3
TA	-	-	3																		3
TC	-	-	1																		1
AAT	-	1																			1
ATT	-	1																			1
TTA	-	1																			1
AAAT	1																				1
AATA	1																				1
AATC	1																				1
ATCA	1																				1
GAAT	1																				1
TATT	1																				1
TTAT	1																				1
Hibiscus coccineus
Repeats	3	4	5	6	7	8	9	10	11	12	13	14	15	16	17	18	19	total
A	-	-	-	-	-	-	-	15	4	5		2					1	27
T	-	-	-	-	-	-	-	12	10	6		1			1		1	31
AT	-	-	5															5
TA	-	-	2															2
TC	-	-	1															1
AAT	-	1																1
ATA	-	1																1
ATT	-	1																1
TAA	-	1																1
TTA	-	2																2
AATA	1																	1
AGTT	1																	1
ATCA	1																	1
ATCT	1																	1
GAAT	1																	1
TAAG	1																	1
TATT	2																	2
TTAT	1																	1
TTTA	1																	1
TTTC	1																	1
AATAT	1																	1
Hisbiscus denudatus
Repeats	3	4	5	6	7	8	9	10	11	12	13	14	15	16	17	total
A	-	-	-	-	-	-	-	9	8	3	1		1		1	23
T	-	-	-	-	-	-	-	10	4	7	2					23
AT	-	-	3													3
TA	-	-	2													2
TC	-	-	1													1
AAT	-	1														1
ATA	-	4														4
ATT	-					1										1
TTA	-	1														1
AATA	1															1
AATC	1															1
AGTT	1															1
ATCA	1															1
GAAT	1															1
TATT	1															1
TTAT	2															2
ATTTT	1															1
ATTTCG		1														1
Hibiscus fuscus
Repeats	3	4	5	6	7	8	9	10	11	12	13	14	total
A	-	-	-	-	-	-	-	6	5	1		1	13
T	-	-	-	-	-	-	-	12	6	3	1		22
AT	-	-	2	1									3
TA	-	-	1										1
TC	-	-	1										1
AAT	-	1											1
ATA	-	1											1
TAT	-	1		1									2
AATA	1												1
AGTT	1												1
ATCA	1												1
GAAT	1												1
TATT	1												1
TTTA	1												1
CAAAA	1												1
Hibiscus goldsworthii
Repeats	3	4	5	6	7	8	9	10	11	12	13	14	15	16	17	18	total
A	-	-	-	-	-	-	-	14	10	3						1	28
T	-	-	-	-	-	-	-	15	4	5	1	1	1				27
AT	-	-	3														3
TA	-	-	2														2
TC	-	-	1														1
AAT	-	1															1
AGA	-	1															1
TAT	-	1															1
TTA	-	2															2
AATA	1																1
AATC	1																1
AGTT	1																1
ATCA	1																1
GAAT	1																1
TTAT	1																1
AATAT	1																1
TTATT	1																1
Hibiscus hamabo
Repeats	3	4	5	6	7	8	9	10	11	12	13	14	15	16	17	18	19	total
A	-	-	-	-	-	-	-	10	3	4	1	3	1				1	23
C	-	-	-	-	-	-	-	2										2
T	-	-	-	-	-	-	-	12	12	3			2					29
AT	-	-	6		2													8
TA	-	-	2	1														3
TC	-	-	1															1
AAT	-	1																1
ATA	-	1																1
TAA	-	1																1
AATA	2																	2
AGTT	1																	1
ATAA	1																	1
ATCA	1																	1
ATCT	1																	1
GAAT	1																	1
TATT	1																	1
TTTA	1	1																2
CCATA	1																	1
TGAAA	1																	1
Hibiscus leptocladus
Repeats	3	4	5	6	7	8	9	10	11	12	13	14	15	16	17	18	19	20	21	22	23	24	25	26	total
A	-	-	-	-	-	-	-	11	8	2	1	2												1	25
T	-	-	-	-	-	-	-	12	11	4	5		1					1							34
AT	-	-	4																						4
TA	-	-	4																						4
TC	-	-	1																						1
AAT	-	1																							1
ATT	-	1																							1
TTA	-	1																							1
AAAT	1																								1
AATC	1																								1
ATCA	1																								1
TATT	1																								1
TTAT	2																								2
Hibiscus micranthus
Repeats	3	4	5	6	7	8	9	10	11	12	13	14	total
A	-	-	-	-	-	-	-	5	6		1		12
T	-	-	-	-	-	-	-	11	6	5		1	23
AT	-	-	2	1									3
TA	-	-	1										1
TC	-	-	1										1
AAT	-	1											1
ATA	-	2											2
TAT	-	1											1
AATA	1												1
AGTT	1												1
ATCA	1												1
GAAT	1												1
TATT	1												1
TTTA	1												1
Hibiscus moscheutos
Repeats	3	4	5	6	7	8	9	10	11	12	13	14	15	16	17	18	19	total
A	-	-	-	-	-	-	-	15	7	2	1	2					1	28
T	-	-	-	-	-	-	-	17	4	7		1	1		1			31
AT	-	-	5															5
TA	-	-	2															2
TC	-	-	1															1
AAT	-	1																1
ATA	-	1																1
ATT	-	1																1
TAA	-	1																1
TTA	-	2																2
AATA	2																	2
AGTT	1																	1
ATCA	1																	1
ATCT		1																1
GAAT	1																	1
TAAG	1																	1
TATT	2																	2
TTAT	1																	1
TTTA	1																	1
TTTC	1																	1
AATAT	1																	1
AATAGA	1																	1
Hibiscus mutabilis
Repeats	3	4	5	6	7	8	9	10	11	12	13	14	15	16	17	18	19	total
A	-	-	-	-	-	-	-	15	7	2	2	1					1	28
C	-	-	-	-	-	-	-		1									1
T	-	-	-	-	-	-	-	14	6	10	4							34
AT	-	-	8	1														9
TA	-	-	2															2
TC	-	-	1															1
AAT	-	2																2
ATT	-	1																1
TAA	-	1																1
AATA	2																	2
AGTT	1																	1
ATCA	1																	1
ATCT		1																1
GAAT	1																	1
TAAG	1																	1
TATT		1																1
TTAT	1																	1
TTTA	1																	1
TGAAA	1																	1
ATTTTG	1																	1
TTAAGT	1																	1
Hibiscus panduriformis
Repeats	3	4	5	6	7	8	9	10	11	12	13	14	15	16	17	18	19	total
A	-	-	-	-	-	-	-	11	8	4	2						1	26
T	-	-	-	-	-	-	-	20	15	3	2				1			41
AT	-	-	7	3	1													11
TA	-	-	3	1														4
TC	-	-	1															1
AAT	-	1																1
ATA	-	1																1
ATT	-	1		1														2
TAA	-	2																2
TTA	-	1																1
AATA	2																	2
AGTT	1																	1
ATCA	1																	1
ATCT		1																1
GAAT	1																	1
TAAG	1																	1
TATT	2																	2
TTAT	1																	1
TTTA	1																	1
TTTC	1																	1
TATTC	1																	1
TGAAA	1																	1
Hibiscus richardsonii
Repeats	3	4	5	6	7	8	9	10	11	12	13	14	15	16	17	18	19	total
A	-	-	-	-	-	-	-	12	10	4	1	2					1	30
T	-	-	-	-	-	-	-	14	12	7	3		1		1	1		39
AT	-	-	4	3														7
TA	-	-	4															4
TC	-	-	1															1
AAT	-	1																1
ATA	-	2																2
ATT	-	1																1
GAA	-	1																1
TAA	-	2																2
TTA	-	1																1
AATA	2																	2
AGTT	1																	1
ATCA	1																	1
ATCT	1																	1
GAAT	1																	1
TAAG	1																	1
TATT	2																	2
TTAT	1																	1
TTTA	1	1																2
ATCTT	1																	1
Hibiscus rosa-sinensis
Repeats	3	4	5	6	7	8	9	10	11	12	13	14	total
A	-	-	-	-	-	-	-	11	3	1	3	1	19
C	-	-	-	-	-	-	-	1					1
T	-	-	-	-	-	-	-	11	12	3			26
AT	-	-	2	1	2								5
TA	-	-	1	1									2
TC	-	-	1										1
AAT	-	1											1
ATA	-	3											3
AAAG	1												1
AGTT	1												1
ATCA	1												1
GAAT	1												1
AAAAT	1												1
TATTA	1												1
AAAATT	1												1
AATTAA	1												1
Hibiscus sabdariffa
Repeats	3	4	5	6	7	8	9	10	11	12	13	14	15	16	17	18	19	total
A	-	-	-	-	-	-	-	18	7	3			1				1	30
T	-	-	-	-	-	-	-	15	13	8	2	1						39
AT	-	-	7	1	1													9
TA	-	-	2	1														3
TC	-	-	1															1
AAT	-	3	1															4
ATA	-	1																1
TAA	-	1																1
TAT	-	2																2
TTA	-	1																1
AATA	2																	2
AGTT	1																	1
ATCA	1																	1
ATCT	1																	1
GAAT	1																	1
TAAA	1																	1
TATT	3																	3
TTAT	1																	1
TTTA	1																	1
AAGTC	1																	1
AATAT	1																	1
ATAGA	1																	1
TATAG		1																1
Hibiscus sinosyriacus
Repeats	3	4	5	6	7	8	9	10	11	12	13	14	15	total
A	-	-	-	-	-	-	-	21	10	2	2		1	36
C	-	-	-	-	-	-	-	2						2
T	-	-	-	-	-	-	-	20	9	7	5	1		42
AT	-	-	3											3
TA	-	-	5											5
TC	-	-	1											1
AAT	-	3												3
ATA	-	1	1											2
ATT	-	1												1
TTA	-	1												1
AATA	1													1
AGTT	1													1
ATCA	1													1
GAAT	1													1
TTAT	2													2
AATAT	1													1
ATATT	1													1
TAAAG	1													1
Hibiscus sp. Gardneri
Repeats	3	4	5	6	7	8	9	10	11	12	13	14	total
A	-	-	-	-	-	-	-	11	10	2			23
T	-	-	-	-	-	-	-	14	4	5	3	1	27
AT	-	-	2										2
TA	-	-	3										3
TC	-	-	1										1
AAT	-	1											1
ATT	-	1											1
TTA	-	1											1
AAAT	1												1
AATA	1												1
AATC	1												1
ATCA	1												1
GAAT	1												1
TATT	1												1
TTAT	1												1
Hibiscus sturtii var. campylochlamys
Repeats	3	4	5	6	7	8	9	10	11	12	13	14	15	16	17	total
A	-	-	-	-	-	-	-	8	8	4	2	1		1		24
T	-	-	-	-	-	-	-	14	10	4	3	3			1	35
AT	-	-	2													2
TA	-	-	3													3
TC	-	-	1													1
AAT	-	1														1
ATT	-	1														1
TAT	-	2														2
TTA	-	2														2
AAAT	2															2
AATA	1															1
AATC	1															1
AGTT	1															1
ATCA	1															1
GAAT	1															1
TATT	1															1
TTAT	1															1
TTAAA	1															1
Hibiscus sturtii var. platychlamys
Repeats	3	4	5	6	7	8	9	10	11	12	13	14	15	16	17	total
A	-	-	-	-	-	-	-	16	7	5		2				30
C	-	-	-	-	-	-	-	1								1
T	-	-	-	-	-	-	-	12	7	5	4	3	1		1	33
AT	-	-	2													2
TA	-	-	2													2
TC	-	-	1													1
AAT	-	1														1
ATT	-		1													1
TAT	-	2														2
TTA	-	2														2
AAAT	1															1
AATA	1															1
AATC	1															1
AGTT	1															1
ATCA	1															1
GAAT	1															1
TATT	1															1
TTAT	3															3
AAGAA	1															1
AATAA	1															1
Hibiscus syriacus
Repeats	3	4	5	6	7	8	9	10	11	12	13	14	15	total
A	-	-	-	-	-	-	-	22	10	3	1	1	1	38
C	-	-	-	-	-	-	-	1						1
T	-	-	-	-	-	-	-	20	9	7	4	2		42
AT	-	-	3											3
TA	-	-	5											5
TC	-	-	1											1
AAT	-	3												3
ATA	-	1		1										2
ATT	-	1												1
TTA	-	1												1
AATA	1													1
AGTT	1													1
ATCA	1													1
GAAT	1													1
TTAT	2													2
AATAT	1													1
ATATT	1													1
TAAAG	1													1
Hibiscus taiwanensis
Repeats	3	4	5	6	7	8	9	10	11	12	13	14	15	16	17	18	19	total
A	-	-	-	-	-	-	-	14	8	4	1	1					1	29
C	-	-	-	-	-	-	-		1									1
T	-	-	-	-	-	-	-	13	10	9	3							35
AT	-	-	8	1														9
TA	-	-	2															2
TC	-	-	1															1
AAT	-	2																2
ATT	-	1																1
TAA	-	1																1
AATA	2																	2
AGTT	1																	1
ATCA	1																	1
ATCT		1																1
GAAT	1																	1
TAAG	1																	1
TATT		1																1
TTAT	1																	1
TTTA		1																1
ATTTA	1																	1
TGAAA	1																	1
ATTTTG	1																	1
Hibiscus tiliaceus
Repeats	3	4	5	6	7	8	9	10	11	12	13	14	15	16	17	18	19	total
A	-	-	-	-	-	-	-	10	4	3		4	1				1	23
C	-	-	-	-	-	-	-	1		1								2
T	-	-	-	-	-	-	-	11	12	3			2					28
AT	-	-	6	1	1													8
TA	-	-	2	1														3
TC	-	-	1															1
AAT	-	1																1
ATA	-	1																1
TAA	-	1																1
TTA	-	1																1
AATA	2																	2
AGTT	1																	1
ATAA	1																	1
ATCA	1																	1
ATCT	1																	1
GAAT	1																	1
TATT	1																	1
TTTA	1	1																2
CCATA	1																	1
TGAAA	1																	1
Hibiscus tridactylites
Repeats	3	4	5	6	7	8	9	10	11	12	13	14	15	16	17	18	19	total
A	-	-	-	-	-	-	-	14	11	6	1	1					1	34
T	-	-	-	-	-	-	-	16	6	12	1	2	2				1	40
AT	-	-	6	2														8
TA	-	-	3															3
TC	-	-	1															1
AAT	-	2																2
ATA	-	1																1
ATT	-	1																1
GAA	-	1																1
TAA	-	2																2
TTA	-	1																1
AATA	2																	2
AGTT	1																	1
ATCA	1																	1
ATCT	1																	1
GAAT	1																	1
TAAG	1																	1
TATT	1																	1
TTAT	1																	1
TTTA	1	1																2
ATCTT		1																1
Hibiscus trionum
Repeats	3	4	5	6	7	8	9	10	11	12	13	14	15	16	17	18	19	total
A	-	-	-	-	-	-	-	14	10	6	1	1					1	33
T	-	-	-	-	-	-	-	16	7	12	1	2	1				1	40
AT	-	-	6	2														8
TA	-	-	3															3
TC	-	-	1															1
AAT	-	2																2
ATA	-	1																1
ATT	-	1																1
GAA	-	1																1
TAA	-	2																2
TTA	-	1																1
AATA	2																	2
AGTT	1																	1
ATCA	1																	1
ATCT	1																	1
GAAT	1																	1
TAAG	1																	1
TATT	1																	1
TTAT	1																	1
TTTA	1	1																2
ATCTT		1																1
Hibiscus verdcourtii
Repeats	3	4	5	6	7	8	9	10	11	12	13	14	15	16	17	18	19	total
A	-	-	-	-	-	-	-	19	9	6	1	2		1			1	39
T	-	-	-	-	-	-	-	14	10	11	3	1			1			40
AT	-	-	7	1														8
CT	-	-			1													1
TA	-	-	5															5
TC	-	-	1															1
AAT	-	1																1
ATT	-		1															1
TAA	-	1																1
TTA	-	1																1
AATA	2																	2
AGTT	1																	1
ATCA	1																	1
ATCT	1																	1
GAAT	1																	1
TAAG	1																	1
TATT	3																	3
TTAT	1																	1
TGAAA	1																	1
ATAGAA	1																	1
Hibiscus volkensii
Repeats	3	4	5	6	7	8	9	10	11	12	13	14	15	16	17	18	19	total
A	-	-	-	-	-	-	-	13	7								1	21
C	-	-	-	-	-	-	-		1				1					2
T	-	-	-	-	-	-	-	9	6	4		1		1				21
AT	-	-	8															8
TA	-	-	2	1														3
TC	-	-	1															1
AAT	-	2																2
ATA	-	1																1
TAA	-	2																2
AAAC	1																	1
AATA	1																	1
AGTT	1																	1
ATCA	1																	1
ATCT	1																	1
GAAT	1																	1
TAAG	1																	1
TATT	1																	1
TTTAT	1																	1
