# Supplementary material for: Comparative chloroplast genomics of Hibiscus (Hibisceae, Malvoideae, Malvaceae) and its phylogenetic implications
Source: Research Square preprint supplement (doi:10.21203/rs.3.rs-7085489/v1), 2025-09-05
Supplement: Supplementary file 2 [file 5d2ee81c9e69b273ce80bec1.docx]

Table S1. List of species from the tribe Hibisceae utilized in phylogeny reconstruction.

| **Species** | **Accession** |
| --- | --- |
| *Abelmoschus manihot* | NC_053353.1 |
| *Abelmoschus moschatus* | NC_053355.1 |
| *Abelmoschus sagittifolius* | NC_053354.1 |
| *Abelmoschus esculentus* | NC_035234.1 |
| *Kosteletzkya pentacarpos* | OK336488.1 |
| *Kydia calycina* | ON881736.1 |
| *Kydia glabrescens* | ON881649.1 |
| *Malvaviscus penduliflorus* | NC_066439.1 |
| *Urena lobata* | MZ901910.1 |
| *Urena procumbens* | MN533975.1 |
| *Thepparatia scandens* | NC_087630.1 |
| *Cenocentrum tonkinense* | OQ570481.1 |

Table S2. Genetic features of chloroplast genomes of *Hibiscus* species

| Category for genes | Group of genes | Name of genes | Amount |
| --- | --- | --- | --- |
| Self-replication | Large subunit of ribosome | *rpl14*, *rpl16**, *rpl2*, a*, *rpl20*, *rpl22*, *rpl23a*, *rpl32*, *rpl33*, *rpl36* | 11 |
| Small subunit of ribosome | *rps11*, *rps12**, *rps14*, *rps15*, *rps16**, *rps18*, *rps19*, *rps2*, *rps3*, *rps4*, *rps7a*, *rps8* | 13 |
| DNA dependent RNA polymerase | *rpoA*, *rpoB*, *rpoC1**, *rpoC2* | 4 |
| rRNA genes | *rrn16a*, *rrn23a*, *rrn4.5a*, *rrn5a* | 8 |
| tRNA genes | *trnA-UGC*, a*, *trnC-GCA*, *trnD-GUC*, *trnE-UUC*, *trnF-GAA*, *trnG-GCC*, *trnG-UCC**, *trnH-GUG*, *trnI-CAUa*, *trnI-GAU*, a*, *trnK-UUU**, *trnL-CAAa*, *trnL-UAA**, *trnL-UAG*, *trnM-CAU*, *trnN-GUUa*, *trnP-UGG*, *trnQ-UUG*, *trnR-ACGa*, *trnR-UCU*, *trnS-GCU*, *trnS-GGA*, *trnS-UGA*, *trnT-GGU*, *trnT-UGU*, *trnV-GACa*, *trnV-UAC**, *trnW-CCA*, *trnY-GUA*, *trnfM-CAU* | 37 |
| Photosynthesis | Photosystem Ⅰ | *psaA*, *psaB*, *psaC*, *psaI*, *psaJ* | 5 |
| Photosystem Ⅱ | *psbA*, *psbB*, *psbC*, *psbD*, *psbE*, *psbF*, *psbH*, *psbI*, *psbJ*, *psbK*, *psbL*, *psbM*, *psbN (psbf1)*, *psbT*, *psbZ* | 15 |
| NADPH dehydrogenase | *ndhA**, *ndhB*, a*, *ndhC*, *ndhD*, *ndhE*, *ndhF*, *ndhG*, *ndhH*, *ndhI*, *ndhJ*, *ndhK* | 12 |
| Cytochrome b/f complex | *petA*, *petB**, *petD**, *petG*, *petL*, *petN* | 6 |
| Subunits of ATP synthase | *atpA*, *atpB*, *atpE*, *atpF**, *atpH*, *atpI* | 6 |
| Large subunit of Rubisco | *rbcL* | 1 |
| Photosystem I assembly proteins | *ycf3**(*paf1*), *ycf4*(*pafII*) | 2 |
| Other genes | Protease | *clpP** | 1 |
| Maturase | *matK* | 1 |
| Envelop membrane protein | *cemA* | 1 |
| Subunit of Acetyl-CoA-carboxylase | *accD* | 1 |
| C-type cytochrome synthesis gene | *ccsA* | 1 |
| Conserved open reading frames | *ycf1*, *ycf2a* | 3 |
| Excluding genes | Pseudogenes | *ycf1*, *infA* | 2 |
| Total number of genes | | | 130 |

*Intron containing genes; aDuplicated genes
