# Supplementary material for: Comparative chloroplast genomics of Hibiscus (Hibisceae, Malvoideae, Malvaceae) and its phylogenetic implications
Source: Research Square preprint supplement (doi:10.21203/rs.3.rs-7085489/v1), 2025-09-05
Supplement: Supplementary file 3 [file 6a714a9bd456b5bdffbec8da.xlsx]

## Sheet: Sheet1
Table S3. Relative synonymous codon usage analysis of Hibiscus species
Amino Acid	Codon	Hibiscus aponeurus	Hibiscus brachysiphonius	Hibiscus burtonii	Hibiscus campanulatus	Hibiscus cannabinus	Hibiscus coatesii	Hibiscus coccineus	Hibiscus denudatus	Hibiscus fuscus	Hibiscus goldsworthii	Hibiscus hamabo	Hibiscus leptocladus	Hibiscus micranthus	Hibiscus moscheutos	Hibiscus mutabilis	Hibiscus panduriformis	Hibiscus richardsonii	Hibiscus rosa-sinensis	Hibiscus sabdariffa	Hibiscus sinosyriacus	Hibiscus sp. Gardneri	Hibiscus sturtii var. campylochlamys	Hibiscus sturtii var. platychlamys	Hibiscus syriacus	Hibiscus taiwanensis	Hibiscus tiliaceus	Hibiscus tridactylites	Hibiscus trionum	Hibiscus verdcourtii	Hibiscus volkensii
Ala	GCT	1.74965	1.7507	1.75664	1.76816	1.76023	1.75576	1.77337	1.75664	1.74207	1.76783	1.74489	1.75419	1.74684	1.77337	1.76771	1.75865	1.77086	1.74912	1.76247	1.7507	1.75576	1.75664	1.76134	1.7507	1.76645	1.75624	1.76487	1.76487	1.77086	1.75809
Ala	GCC	0.677918	0.67507	0.671329	0.667598	0.671368	0.669923	0.668555	0.665734	0.687808	0.668531	0.676533	0.673184	0.686357	0.668555	0.674221	0.677488	0.670438	0.675543	0.666198	0.672269	0.669923	0.674126	0.672715	0.672269	0.673744	0.675695	0.674221	0.674221	0.673267	0.675105
Ala	GCA	1.05767	1.07003	1.06853	1.06983	1.05783	1.06629	1.05949	1.06573	1.06272	1.06294	1.06836	1.06704	1.05767	1.06232	1.06232	1.06422	1.07214	1.05957	1.06535	1.06162	1.06629	1.06014	1.06071	1.06723	1.0644	1.05773	1.07082	1.06799	1.05799	1.05767
Ala	GCG	0.514768	0.504202	0.503497	0.494413	0.510578	0.508025	0.498584	0.511888	0.5074	0.500699	0.510218	0.505587	0.509142	0.495751	0.495751	0.499647	0.486563	0.515767	0.505973	0.515406	0.508025	0.509091	0.505234	0.509804	0.4954	0.510335	0.490085	0.492918	0.497878	0.509142
Arg	CGT	1.27524	1.2806	1.27844	1.28221	1.25921	1.2798	1.27387	1.27524	1.29081	1.2766	1.26316	1.2806	1.28705	1.27227	1.26336	1.2741	1.26872	1.25643	1.26395	1.27467	1.279	1.28221	1.28652	1.27467	1.26256	1.2799	1.26734	1.26814	1.26692	1.26872
Arg	CGC	0.470219	0.45951	0.46763	0.46763	0.460962	0.46675	0.478643	0.466458	0.457786	0.465582	0.458647	0.463277	0.465291	0.481807	0.482715	0.487713	0.483323	0.458934	0.462696	0.46763	0.466458	0.460088	0.458934	0.46763	0.482412	0.449903	0.484237	0.484543	0.484962	0.460667
Arg	CGA	1.40313	1.3936	1.39535	1.38781	1.36415	1.39272	1.3794	1.39937	1.39587	1.39299	1.3797	1.3936	1.39212	1.3739	1.38404	1.3724	1.38578	1.38433	1.37304	1.40666	1.39185	1.39912	1.39561	1.40666	1.38317	1.40013	1.3884	1.38927	1.39474	1.40843
Arg	CGG	0.391223	0.399247	0.399749	0.395977	0.430981	0.395232	0.414573	0.391223	0.405253	0.397997	0.43985	0.399247	0.405253	0.410289	0.40352	0.400756	0.404028	0.42884	0.417555	0.395977	0.394984	0.392206	0.391223	0.395977	0.403266	0.438268	0.401009	0.401262	0.406015	0.41158
Arg	AGA	1.78683	1.78531	1.77247	1.78378	1.81761	1.78419	1.77513	1.78307	1.77861	1.78348	1.78571	1.77778	1.77111	1.78043	1.79133	1.79962	1.77848	1.79436	1.8094	1.7687	1.78307	1.77624	1.78307	1.7687	1.78643	1.77634	1.77806	1.77539	1.78195	1.78225
Arg	AGG	0.673354	0.681733	0.686361	0.68259	0.667083	0.681305	0.678392	0.684639	0.67167	0.683354	0.672932	0.685499	0.679174	0.681305	0.675047	0.665406	0.679673	0.677116	0.673354	0.686361	0.684639	0.690132	0.684639	0.686361	0.682161	0.655462	0.680958	0.681388	0.665414	0.668345
Asn	AAT	1.5347	1.53024	1.53061	1.52747	1.53069	1.52904	1.52246	1.53061	1.53165	1.53024	1.52611	1.52784	1.53239	1.52321	1.52627	1.52314	1.52463	1.5161	1.52566	1.52719	1.52941	1.53401	1.53171	1.52756	1.5259	1.51544	1.52388	1.52351	1.52418	1.52978
Asn	AAC	0.4653	0.469756	0.469388	0.472527	0.469308	0.470958	0.477541	0.469388	0.468354	0.469756	0.473889	0.472157	0.467615	0.47679	0.473725	0.476863	0.475371	0.483896	0.474339	0.472813	0.470588	0.465989	0.468285	0.472441	0.474097	0.484561	0.476116	0.476489	0.475819	0.470219
Asp	GAT	1.60335	1.59926	1.60148	1.60111	1.59557	1.60111	1.59555	1.59889	1.60297	1.60037	1.60369	1.60037	1.60446	1.59667	1.59889	1.60074	1.60519	1.60075	1.60297	1.59297	1.60297	1.59963	1.60223	1.59297	1.6	1.6	1.60334	1.60334	1.60407	1.60668
Asp	GAC	0.396648	0.400742	0.398517	0.398887	0.404432	0.398887	0.404453	0.401114	0.397032	0.39963	0.396313	0.399628	0.395543	0.40333	0.401109	0.399257	0.39481	0.399254	0.397032	0.407031	0.397032	0.400372	0.39777	0.407031	0.4	0.4	0.396664	0.396664	0.39593	0.393321
Cys	TGT	1.47297	1.48837	1.48667	1.50168	1.51839	1.49164	1.49835	1.48	1.47797	1.48667	1.50831	1.48495	1.47797	1.49669	1.5	1.49669	1.47855	1.48495	1.52349	1.49333	1.49164	1.48837	1.48667	1.49324	1.50166	1.50336	1.47682	1.48026	1.49502	1.49833
Cys	TGC	0.527027	0.511628	0.513333	0.498316	0.481605	0.508361	0.50165	0.52	0.522034	0.513333	0.491694	0.51505	0.522034	0.503311	0.5	0.503311	0.521452	0.51505	0.47651	0.506667	0.508361	0.511628	0.513333	0.506757	0.498339	0.496644	0.523179	0.519737	0.504983	0.501672
Gln	CAA	1.5414	1.53994	1.54255	1.53895	1.53765	1.54109	1.53105	1.5383	1.54915	1.54207	1.53155	1.53617	1.54866	1.53155	1.53105	1.53092	1.54028	1.53128	1.53191	1.53781	1.54109	1.54584	1.54536	1.5383	1.53105	1.54405	1.53813	1.53714	1.52452	1.53404
Gln	CAG	0.458599	0.460064	0.457447	0.461046	0.462354	0.458911	0.468951	0.461702	0.450855	0.457934	0.468449	0.46383	0.451337	0.468449	0.468951	0.469083	0.459721	0.468717	0.468085	0.462194	0.458911	0.454158	0.454642	0.461702	0.468951	0.455947	0.461869	0.462863	0.47548	0.465957
Glu	GAA	1.47384	1.47322	1.47839	1.47145	1.47546	1.47476	1.48094	1.48018	1.4699	1.47647	1.4733	1.47407	1.47067	1.47845	1.48061	1.47762	1.48213	1.47322	1.47253	1.475	1.47476	1.47399	1.47145	1.47609	1.47953	1.47487	1.48213	1.48213	1.48609	1.47291
Glu	GAG	0.526161	0.526779	0.521612	0.528551	0.524542	0.525238	0.519062	0.519824	0.530103	0.523529	0.526701	0.525931	0.529326	0.521549	0.519386	0.522377	0.51787	0.526779	0.527473	0.525	0.525238	0.526007	0.528551	0.523915	0.520468	0.525131	0.51787	0.51787	0.513909	0.527086
Gly	GGT	1.27903	1.2854	1.28398	1.27947	1.28485	1.28319	1.27965	1.27594	1.28053	1.28319	1.28273	1.28319	1.27982	1.27833	1.28053	1.28862	1.28791	1.28264	1.27233	1.27072	1.2839	1.28627	1.28335	1.26932	1.27912	1.28555	1.28211	1.28132	1.28784	1.27664
Gly	GGC	0.420473	0.415929	0.41326	0.411732	0.409917	0.413717	0.416988	0.415011	0.426843	0.415929	0.418042	0.420354	0.431006	0.413641	0.415842	0.417812	0.408791	0.418733	0.425579	0.422099	0.411732	0.41037	0.414553	0.426049	0.417582	0.412094	0.414929	0.415385	0.418272	0.424075
Gly	GGA	1.56081	1.56195	1.56906	1.57167	1.57135	1.56416	1.56646	1.55629	1.54895	1.56416	1.56436	1.55531	1.5459	1.57096	1.56656	1.5591	1.57143	1.54931	1.57001	1.56685	1.56502	1.56426	1.5634	1.56733	1.56703	1.55879	1.5719	1.57143	1.56742	1.55715
Gly	GGG	0.739681	0.736726	0.733702	0.737133	0.733884	0.738938	0.7369	0.752759	0.743674	0.736726	0.734873	0.74115	0.743266	0.737074	0.737074	0.734469	0.731868	0.749311	0.732084	0.740331	0.739347	0.739106	0.738699	0.737307	0.736264	0.743561	0.731065	0.731868	0.726472	0.742131
His	CAT	1.48287	1.48589	1.48438	1.49057	1.49766	1.48357	1.49765	1.48903	1.47582	1.49296	1.49686	1.48276	1.47717	1.49843	1.49765	1.50158	1.49686	1.49533	1.50233	1.48903	1.48438	1.48823	1.4867	1.48983	1.49843	1.50641	1.49686	1.49606	1.50316	1.50313
His	CAC	0.517134	0.514107	0.515625	0.509434	0.50234	0.516432	0.502355	0.510972	0.524181	0.507042	0.503145	0.517241	0.522835	0.501567	0.502355	0.498423	0.503145	0.504673	0.497667	0.510972	0.515625	0.511774	0.513302	0.510172	0.501567	0.49359	0.503145	0.503937	0.496835	0.496875
Ile	ATT	1.46991	1.46876	1.46947	1.46809	1.46623	1.47012	1.46726	1.46406	1.46397	1.47602	1.46611	1.47142	1.46589	1.46468	1.46939	1.47273	1.46605	1.47392	1.46947	1.4641	1.4708	1.46933	1.47004	1.46484	1.46939	1.46837	1.46741	1.46667	1.46205	1.47074
Ile	ATC	0.595185	0.588835	0.586726	0.587766	0.590728	0.586985	0.598664	0.596273	0.593861	0.58881	0.594152	0.587506	0.591173	0.599733	0.594942	0.594678	0.593875	0.593848	0.588053	0.589096	0.586726	0.589333	0.588549	0.587793	0.594942	0.59354	0.593348	0.594667	0.592543	0.595745
Ile	ATA	0.934909	0.942401	0.943805	0.944149	0.943046	0.942895	0.934076	0.939663	0.942171	0.935169	0.939743	0.941072	0.942934	0.935584	0.93567	0.932594	0.94008	0.932234	0.942478	0.946809	0.942478	0.941333	0.941411	0.947368	0.93567	0.938089	0.939246	0.938667	0.945406	0.933511
Leu	TTA	1.87581	1.87813	1.87595	1.88708	1.88905	1.87758	1.87419	1.8769	1.87758	1.87323	1.87662	1.88099	1.87256	1.87243	1.86349	1.87134	1.87866	1.8821	1.88708	1.87106	1.88193	1.8841	1.88137	1.87554	1.86729	1.89207	1.88069	1.87541	1.87297	1.88696
Leu	TTG	1.23899	1.25136	1.25136	1.25081	1.23631	1.25389	1.24512	1.25344	1.24303	1.2452	1.24459	1.24964	1.24041	1.24541	1.25027	1.25334	1.2481	1.23799	1.24213	1.25172	1.25172	1.24303	1.24123	1.25036	1.24847	1.24449	1.24295	1.2452	1.25153	1.25435
Leu	CTT	1.24549	1.25571	1.25571	1.25081	1.26441	1.25389	1.25597	1.25561	1.24303	1.25172	1.25758	1.25617	1.24475	1.25838	1.2546	1.24901	1.25677	1.23799	1.25516	1.24737	1.25389	1.25172	1.25425	1.24819	1.25496	1.2489	1.25813	1.25824	1.25153	1.25217
Leu	CTC	0.409386	0.406964	0.404788	0.410423	0.412824	0.406375	0.40564	0.401883	0.408548	0.408548	0.400433	0.404935	0.410572	0.404324	0.400867	0.405493	0.409534	0.41048	0.408252	0.415067	0.406375	0.408548	0.407957	0.414616	0.400288	0.398678	0.407809	0.408548	0.404908	0.397826
Leu	CTA	0.829603	0.813928	0.820457	0.805646	0.817003	0.812749	0.830803	0.818972	0.827961	0.830134	0.82684	0.814224	0.829833	0.828108	0.832069	0.828334	0.816901	0.831878	0.809989	0.823615	0.810576	0.827961	0.826763	0.82055	0.830869	0.821586	0.819957	0.821442	0.822808	0.813043
Leu	CTG	0.400722	0.393906	0.39173	0.395223	0.380403	0.395509	0.388286	0.393193	0.399855	0.391163	0.393939	0.394049	0.401883	0.391351	0.3987	0.392483	0.390033	0.399563	0.397394	0.391163	0.395509	0.384643	0.388427	0.390738	0.398125	0.394273	0.390456	0.391163	0.396247	0.395652
Lys	AAA	1.48465	1.48106	1.48212	1.48355	1.48666	1.48069	1.48212	1.47989	1.48714	1.48318	1.48429	1.48355	1.48821	1.4818	1.47963	1.48281	1.47937	1.47882	1.48955	1.48	1.48281	1.48502	1.48502	1.47752	1.47857	1.47997	1.48148	1.48433	1.48681	1.48052
Lys	AAG	0.515346	0.518942	0.517883	0.516452	0.513338	0.519313	0.517883	0.520115	0.512857	0.516822	0.515714	0.516452	0.511794	0.518201	0.520372	0.517192	0.520626	0.521177	0.510454	0.52	0.517192	0.514979	0.514979	0.522484	0.521429	0.520029	0.518519	0.51567	0.513186	0.519481
Met	ATG	1	1	1	1	1	1	1	1	1	1	1	1	1	1	1	1	1	1	1	1	1	1	1	1	1	1	1	1	1	1
Phe	TTT	1.2835	1.29341	1.29032	1.29832	1.29587	1.29341	1.29993	1.28928	1.28523	1.28985	1.28919	1.29032	1.28215	1.30054	1.29562	1.2996	1.30007	1.28963	1.29167	1.29499	1.29341	1.29879	1.29784	1.29324	1.29642	1.29658	1.29966	1.30094	1.30826	1.29032
Phe	TTC	0.716498	0.706595	0.709677	0.701684	0.70413	0.706595	0.700068	0.710722	0.714767	0.710155	0.710811	0.709677	0.717845	0.699461	0.704377	0.700405	0.699933	0.710368	0.708333	0.705007	0.706595	0.701211	0.702156	0.706757	0.703579	0.703419	0.700337	0.699055	0.691739	0.709677
Pro	CCT	1.55185	1.54637	1.55515	1.55064	1.53932	1.55087	1.55307	1.52855	1.53506	1.55125	1.54132	1.55147	1.53309	1.55246	1.56134	1.55844	1.55019	1.53562	1.54074	1.55863	1.55087	1.55351	1.55863	1.55945	1.56134	1.53493	1.54731	1.54647	1.5539	1.54922
Pro	CCC	0.759259	0.741965	0.735294	0.747698	0.762257	0.740605	0.756052	0.758748	0.767528	0.742382	0.779944	0.742647	0.786765	0.75766	0.754647	0.749536	0.765799	0.780759	0.766667	0.749769	0.740605	0.734317	0.734995	0.748387	0.754647	0.773206	0.760668	0.762082	0.750929	0.76173
Pro	CCA	1.13333	1.14601	1.13603	1.13812	1.13599	1.14757	1.12104	1.13076	1.13284	1.13758	1.12535	1.13603	1.12132	1.12163	1.12268	1.11317	1.12639	1.11378	1.14074	1.13389	1.14757	1.15129	1.13758	1.13548	1.12268	1.13684	1.13173	1.13011	1.13755	1.13707
Pro	CCG	0.555556	0.565657	0.573529	0.563536	0.562442	0.560953	0.569832	0.581952	0.564576	0.56879	0.553389	0.569853	0.558824	0.568245	0.561338	0.57885	0.557621	0.569843	0.551852	0.55771	0.560953	0.560886	0.56879	0.556682	0.561338	0.555024	0.560297	0.561338	0.557621	0.551978
Ser	TCT	1.73077	1.71598	1.71344	1.72065	1.72615	1.72022	1.7062	1.72871	1.72997	1.71513	1.69901	1.71768	1.727	1.71174	1.70708	1.70623	1.71471	1.70963	1.70918	1.72277	1.72022	1.71174	1.72024	1.72786	1.71217	1.69651	1.7181	1.71217	1.70242	1.70579
Ser	TCC	0.952663	0.967838	0.969368	0.965825	0.943154	0.969847	0.955831	0.959406	0.967359	0.961424	0.968317	0.968796	0.964392	0.956909	0.958931	0.958457	0.962853	0.96	0.952854	0.956436	0.969847	0.965825	0.96131	0.955962	0.958457	0.968134	0.961424	0.961424	0.955017	0.950966
Ser	TCA	1.23669	1.24691	1.25988	1.24517	1.28127	1.25161	1.27444	1.24455	1.22552	1.24926	1.27129	1.25409	1.23739	1.27192	1.26472	1.26113	1.25706	1.24444	1.2804	1.25347	1.25161	1.25409	1.25595	1.24988	1.26113	1.26859	1.25519	1.25816	1.2694	1.25409
Ser	TCG	0.556213	0.549233	0.536561	0.546805	0.527929	0.539792	0.538958	0.549505	0.554896	0.551929	0.540594	0.543834	0.548961	0.53789	0.549233	0.554896	0.543834	0.56	0.53598	0.540594	0.539792	0.546805	0.547619	0.546264	0.545994	0.549317	0.545994	0.545994	0.539792	0.558692
Ser	AGT	1.1716	1.16081	1.15909	1.15602	1.17746	1.1567	1.16129	1.16436	1.16617	1.16617	1.15545	1.15602	1.16914	1.15899	1.14894	1.15134	1.16493	1.17037	1.16427	1.16733	1.1567	1.16196	1.16071	1.16081	1.15134	1.15023	1.1632	1.16617	1.16856	1.1679
Ser	AGC	0.352071	0.359228	0.36166	0.365527	0.344043	0.361839	0.363275	0.353465	0.356083	0.356083	0.365347	0.359584	0.353116	0.362556	0.371103	0.367953	0.356612	0.355556	0.35732	0.359406	0.361839	0.359584	0.354167	0.359228	0.37092	0.367223	0.356083	0.356083	0.364805	0.362556
Thr	ACT	1.54407	1.54985	1.55034	1.55337	1.54148	1.54731	1.55723	1.54683	1.52959	1.55404	1.54286	1.54848	1.53004	1.55322	1.54333	1.54333	1.54423	1.54966	1.53358	1.55942	1.55034	1.55707	1.54731	1.55891	1.54449	1.5542	1.54239	1.54586	1.54286	1.54497
Thr	ACC	0.765957	0.773414	0.77517	0.778198	0.766214	0.77517	0.746988	0.779456	0.77997	0.777022	0.76391	0.772727	0.781749	0.746627	0.762622	0.765637	0.764618	0.761183	0.77283	0.766086	0.769114	0.777022	0.784254	0.76435	0.763198	0.760305	0.765191	0.766917	0.757895	0.761905
Thr	ACA	1.20365	1.18731	1.19304	1.18395	1.20362	1.19304	1.20482	1.17825	1.19575	1.17914	1.20301	1.18788	1.19544	1.2084	1.20874	1.20573	1.2054	1.18878	1.20453	1.19909	1.19304	1.18519	1.1779	1.1994	1.20965	1.19389	1.2063	1.20301	1.21504	1.2003
Thr	ACG	0.486322	0.489426	0.481453	0.484481	0.488688	0.484481	0.490964	0.495468	0.494689	0.489796	0.490226	0.490909	0.492776	0.491754	0.485305	0.485305	0.485757	0.500379	0.489057	0.475397	0.487509	0.480726	0.490537	0.477341	0.482655	0.491603	0.486122	0.484211	0.484211	0.492819
Trp	TGG	1	1	1	1	1	1	1	1	1	1	1	1	1	1	1	1	1	1	1	1	1	1	1	1	1	1	1	1	1	1
Tyr	TAT	1.59138	1.59509	1.59509	1.591	1.60366	1.59548	1.59548	1.59836	1.5889	1.59755	1.60243	1.59551	1.58805	1.59429	1.59305	1.5959	1.59142	1.59301	1.60122	1.59468	1.59343	1.59429	1.58938	1.59509	1.59305	1.59712	1.59509	1.59305	1.59267	1.60163
Tyr	TAC	0.408624	0.404908	0.404908	0.408998	0.396341	0.404517	0.404517	0.401639	0.4111	0.402451	0.397566	0.404494	0.411946	0.405708	0.406953	0.404103	0.40858	0.406989	0.398779	0.405322	0.406571	0.405708	0.410623	0.404908	0.406953	0.402878	0.404908	0.406953	0.407332	0.398366
Val	GTT	1.43943	1.4408	1.45039	1.44444	1.44523	1.44	1.44413	1.44626	1.44309	1.4359	1.43817	1.4416	1.4392	1.44206	1.44833	1.44468	1.4561	1.45194	1.4416	1.4465	1.43897	1.44342	1.44183	1.44833	1.44833	1.44092	1.45429	1.45247	1.45818	1.42755
Val	GTC	0.513262	0.516405	0.516774	0.527066	0.495021	0.525714	0.495702	0.520996	0.512527	0.51567	0.511794	0.518519	0.51216	0.506438	0.501782	0.499643	0.493933	0.516499	0.498575	0.522111	0.528194	0.515302	0.516774	0.521739	0.501782	0.507205	0.494286	0.49178	0.503217	0.505353
Val	GTA	1.49677	1.4893	1.48465	1.47863	1.49075	1.48571	1.48138	1.48327	1.4889	1.49573	1.49249	1.48718	1.49642	1.48498	1.48824	1.49036	1.49322	1.47202	1.50142	1.47504	1.48465	1.49181	1.49322	1.47684	1.48824	1.48991	1.49429	1.49535	1.48678	1.49607
Val	GTG	0.550538	0.553495	0.54818	0.549858	0.56899	0.548571	0.578797	0.549466	0.555476	0.552707	0.557541	0.552707	0.552217	0.566524	0.561654	0.56531	0.556745	0.559541	0.558405	0.556348	0.54818	0.549466	0.54818	0.5531	0.561654	0.56196	0.557143	0.5604	0.551823	0.571021
Stop	TAA	1.71429	1.67857	1.71429	1.67857	1.67857	1.71429	1.71429	1.71429	1.67857	1.71429	1.67857	1.71429	1.67857	1.71429	1.67857	1.67857	1.71429	1.71429	1.67857	1.71429	1.71429	1.75	1.75	1.71429	1.67857	1.67857	1.71429	1.71429	1.71429	1.64286
Stop	TAG	0.642857	0.678571	0.642857	0.678571	0.714286	0.642857	0.642857	0.642857	0.642857	0.678571	0.642857	0.642857	0.642857	0.642857	0.678571	0.678571	0.642857	0.678571	0.714286	0.642857	0.642857	0.642857	0.642857	0.642857	0.678571	0.642857	0.642857	0.642857	0.642857	0.678571
Stop	TGA	0.642857	0.642857	0.642857	0.642857	0.607143	0.642857	0.642857	0.642857	0.678571	0.607143	0.678571	0.642857	0.678571	0.642857	0.642857	0.642857	0.642857	0.607143	0.607143	0.642857	0.642857	0.607143	0.607143	0.642857	0.642857	0.678571	0.642857	0.642857	0.642857	0.678571
