# Supplementary material for: Comparative chloroplast genomics of Hibiscus (Hibisceae, Malvoideae, Malvaceae) and its phylogenetic implications
Source: Research Square preprint supplement (doi:10.21203/rs.3.rs-7085489/v1), 2025-09-05
Supplement: Supplementary file 4 [file 6c43c721b8c8988ed1316b8c.xlsx]

## Sheet: SNPs
Table S6. Transition and transversion substitutions analysis among Hibiscus species
Substitution	Hibiscus aponeurus	Hibiscus brachysiphonius	Hibiscus burtonii	Hibiscus campanulatus	Hibiscus cannabinus	Hibiscus coatesii	Hibiscus coccineus	Hibiscus denudatus	Hibiscus fuscus	Hibiscus goldsworthii	Hibiscus hamabo	Hibiscus leptocladus	Hibiscus micranthus	Hibiscus moscheutos	Hibiscus mutabilis	Hibiscus panduriformis	Hibiscus richardsonii	Hibiscus sabdariffa	Hibiscus sinosyriacus	Hibiscus sp. Gardneri	Hibiscus sturtii var. campylochlamys	Hibiscus sturtii var. platychlamys	Hibiscus syriacus	Hibiscus taiwanensis	Hibiscus tiliaceus	Hibiscus tridactylites	Hibiscus trionum	Hibiscus verdcourtii	Hibiscus volkensii
A_to_G	152	144	150	152	283	129	264	187	160	177	262	144	157	259	235	243	251	274	163	144	173	175	164	243	263	246	252	243	254
G_to_A	168	190	197	219	369	180	310	198	179	213	271	199	150	306	276	298	313	319	216	190	250	241	219	279	273	292	296	311	249
T_to_G	100	99	113	115	156	101	154	127	106	101	147	108	112	155	156	148	140	151	110	104	109	104	109	164	143	139	139	146	134
G_to_T	185	214	211	216	298	202	286	214	192	221	274	216	181	288	283	283	283	290	218	209	212	204	213	279	278	288	288	292	254
A_to_C	115	119	118	126	160	119	166	146	114	134	160	122	135	167	168	171	160	144	137	125	138	133	137	177	162	155	157	165	139
C_to_A	157	178	175	181	251	165	255	196	174	191	231	178	172	257	228	257	256	258	181	171	197	196	178	228	228	249	248	259	223
C_to_T	171	188	183	202	381	176	280	214	159	210	267	180	158	282	246	292	289	326	222	189	252	246	229	257	273	283	290	307	246
T_to_C	173	186	188	190	294	165	270	213	196	195	248	185	203	272	244	260	253	288	200	186	205	205	209	257	246	243	253	264	279
G_to_C	56	66	71	65	101	60	87	76	54	64	84	66	56	84	80	90	86	90	70	63	66	60	69	78	83	84	84	92	69
C_to_G	61	75	74	73	80	72	81	80	73	73	81	69	69	81	79	96	81	82	74	76	74	77	73	79	79	81	82	92	69
A_to_T	116	149	165	190	303	135	211	195	120	190	215	179	108	208	185	207	193	229	185	176	202	184	198	196	212	173	185	235	182
T_to_A	107	126	138	171	277	119	206	181	124	192	188	154	100	209	210	195	211	245	210	148	180	193	209	216	181	179	205	241	185
Ts	664	708	718	763	1327	650	1124	812	694	795	1048	708	668	1119	1001	1093	1106	1207	801	709	880	867	821	1036	1055	1064	1091	1125	1028
Tv	897	1026	1065	1137	1626	973	1446	1215	957	1166	1380	1092	933	1449	1389	1447	1410	1489	1185	1072	1178	1151	1186	1417	1366	1348	1388	1522	1255
Ts/Tv	0.740245	0.690058	0.674178	0.671064	0.816113	0.668037	0.777317	0.668313	0.725183	0.681818	0.75942	0.648352	0.71597	0.772257	0.720662	0.755356	0.784397	0.810611	0.675949	0.661381	0.747029	0.753258	0.692243	0.731122	0.772328	0.789318	0.786023	0.739159	0.819124
