# Supplementary material for: Comparative chloroplast genomics of Hibiscus (Hibisceae, Malvoideae, Malvaceae) and its phylogenetic implications
Source: Research Square preprint supplement (doi:10.21203/rs.3.rs-7085489/v1), 2025-09-05
Supplement: Supplementary file 5 [file 81f7f01cb32815d7913a6e2f.xlsx]

## Sheet: Sheet1
Table S7. Analysis of synonymous and non-synonymous substitution of Hibiscus species. The Ka/Ks values are shown for each species.
Sequence	Hibiscus aponeurus	Hibiscus brachysiphonius	Hibiscus burtonii	Hibiscus campanulatus	Hibiscus cannabinus	Hibiscus coatesii	Hibiscus coccineus	Hibiscus denudatus	Hibiscus fuscus	Hibiscus goldsworthii	Hibiscus hamabo	Hibiscus leptocladus	Hibiscus micranthus	Hibiscus moscheutos	Hibiscus mutabilis	Hibiscus panduriformis	Hibiscus richardsonii	Hibiscus sabdariffa	Hibiscus sinosyriacus	Hibiscus sp Gardneri	Hibiscus sturtii var campylochlamys	Hibiscus sturtii var platychlamys	Hibiscus syriacus	Hibiscus taiwanensis	Hibiscus tiliaceus	Hibiscus tridactylites	Hibiscus trionum	Hibiscus verdcourtii	Hibiscus volkensii
accD	0.268311	0.296492	0.255278	0.235617	0.558656	0.235617	0.271685	0.196668	0.285993	0.290519	0.251953	0.377447	0.290121	0.259969	0.25586	0.246879	0.354345	0.359627	0.180002	0.235617	0.455684	0.342601	0.180002	0.296652	0.251953	0.367989	0.367989	0.211459	0.361264
atpA	0	0	0	0.0476433	0.0237512	0	0	0.0304366	0.148264	0	0	0	0.0862883	0	0	0.0310502	0	0	0.0298201	0	0	0	0.0298201	0.0382449	0	0	0	0.036364	0.127769
atpB	0.0823852	0.0996971	0.0996971	0.149651	0.296446	0.103746	0.103351	0.144434	0.214048	0.149456	0.0927079	0.103746	0.167046	0.107694	0.113038	0.152326	0.0987713	0.295785	0.0995087	0.103746	0.0995447	0.0995447	0.0995087	0.113038	0.0927079	0.103089	0.103089	0.153425	0.179937
atpE	0.101014	0.101014	0.219514	0.181289	0.0746569	0.101014	0.101014	0.0830948	0.101014	0.101014	0.0733026	0.101014	0.101014	0.101014	0.101014	0.101014	0.0632201	0.0665875	0.101014	0.101014	0.101014	0.101014	0.101014	0.101014	0.0733026	0.0632201	0.0632201	0.15165	0.0810341
atpF	0	0.309811	0.309811	0.309811	0.498255	0.309811	0.149121	0.120691	0	0.388068	0.192541	0.309811	0	0.149121	0.145793	0.145793	0.145793	0.723675	0.309811	0.309811	0.322137	0.321799	0.309811	0.145793	0.192541	0.145793	0.145793	0.380067	0.309811
atpH	NA	NA	NA	NA	NA	NA	0	NA	NA	NA	0	NA	NA	0	0	0	0	0	0	NA	0	0	0	0	0	0	0	0	NA
atpI	0.246318	0.316801	0.316801	0.491334	0.105385	0.316801	0.123241	0.317074	0.123187	0.753916	0	0.316801	0.247163	0.123241	0.0682472	0.0899494	0.317433	0	0.121684	0.316801	0.420156	0.753916	0.121684	0.0682472	0	0.317433	0.317433	0.123241	0.121684
ccsA	0.713948	0.879732	0.714763	0.714763	0.497294	0.714763	0.788921	0.566283	0.713948	0.378649	0.325582	0.714763	0.561835	1.07057	0.755059	0.636222	0.408162	0.364243	0.662656	0.5816	0.381569	0.402188	0.662656	0.755059	0.325582	0.448343	0.448343	1.06694	0.45345
cemA	0.234592	0.341949	0.653001	0.341949	0.143796	0.341949	0.155915	0.163857	0.233397	0.341949	0.17797	0.341949	0.341949	0.112511	0.204692	0.128592	0.128592	0.121587	0.383242	0.341949	0.241162	0.164163	0.383242	0.204692	0.17797	0.128592	0.128592	0.128592	0.527359
clpP	0.207373	0.159722	0.159722	0.159722	0.246575	0.159722	0.386986	0.159722	0.154639	0.319444	0.520737	0.159722	0.3125	0.518349	0.518349	0.77931	0.77931	0.412844	0.159722	0.159722	0.319444	0.319444	0.159722	0.77931	0.784722	0.77931	0.77931	0.625	0.309278
matK	0.396509	0.656661	0.454405	0.742627	0.538123	0.745512	0.662678	0.549481	0.460427	0.526675	0.488085	0.723694	0.415651	0.621464	0.544507	0.43533	0.567273	0.419057	0.426075	0.745512	0.511122	0.415181	0.449317	0.587379	0.488085	0.612798	0.612798	0.526088	0.541733
ndhA	0.08629	0.196549	0.196549	0.196549	0.427543	0.196549	0.311045	0.316229	0.160325	0.167177	0.520056	0.168278	0.180445	0.252813	0.335093	0.301453	0.223691	0.322414	0.0553952	0.196549	0.069915	0.0627449	0.0553952	0.335093	0.520056	0.212137	0.212137	0.281217	0.0545658
ndhB	0	NA	NA	0.239298	0	NA	0	NA	0	NA	0	NA	0	0	0.312936	0	0	0	NA	NA	NA	NA	NA	0	0	0	0	0	0.313055
ndhC	0	0.074042	0.105149	0.104593	0.075056	0.074042	0.227808	0.113349	0.230799	0.113349	0.113616	0.074042	0.230799	0.227808	0	0	0	0.113349	0.075056	0.074042	0.113349	0.113349	0.075056	0	0.113616	0	0	0	0.0756102
ndhD	0.320225	0.162921	0.139423	0.320225	0.158996	0.213483	0.141791	0.200837	0.385135	0.159664	0.162921	0.159664	0.378531	0.107807	0.0794979	0.141264	0.0575758	0.141264	0.230769	0.213483	0.141264	0.107807	0.230769	0.0794979	0.162921	0.0575758	0.0575758	0.070632	0.160535
ndhE	NA	NA	NA	NA	NA	NA	NA	NA	NA	NA	NA	NA	NA	NA	0.72593	0.721093	0.442414	0.894589	0.72593	NA	NA	NA	0.72593	0.72593	NA	0.442414	0.442414	NA	NA
ndhF	0.398601	0.475472	0.461538	0.540984	0.328512	0.45283	0.329114	0.565574	0.292683	0.516393	0.34642	0.538117	0.372549	0.329114	0.35122	0.329114	0.339394	0.303797	0.442105	0.491803	0.40367	0.366972	0.463158	0.35122	0.364964	0.341772	0.341772	0.341772	0.40367
ndhG	0	0.119353	0.119353	0.0791181	0	0.119353	0.252781	0.119353	0	0.301036	0.0595956	0.426876	0	0.252781	0.30146	0.380004	0.380004	0	0.119353	0.119353	0.141329	0.141329	0.119353	0.30146	0.0595956	0.380004	0.380004	0.30146	0.120516
ndhH	0.0760574	0.0564695	0.11747	0.117349	0.0995011	0.13186	0.0693976	0.04601	0.0760574	0.062552	0.0732958	0.107421	0.0890433	0.0693976	0.0433264	0.0727554	0.0461671	0.091869	0.0912736	0.13186	0.0430252	0.046838	0.0912736	0.0433264	0.0732958	0.0461671	0.0461671	0.0766361	0.0965449
ndhI	0.293785	0.590909	0.295455	0.886364	0.194757	0.590909	0.0973783	0.590909	0.295455	0.590909	0.145658	0.590909	0.590909	0.0973783	0.147727	0.147727	0.0579065	0.145658	0.590909	0.590909	0.886364	0.886364	0.590909	0.147727	0.145658	0.0728291	0.0728291	0.147727	0.0728291
ndhJ	0	0	0	0	0	0	0	0.133348	0	0.0930914	0	0	0	0	0	0	0	0.0935128	0	0	0	0	0	0	0	0	0	0	0
ndhK	0.411769	0.158702	0.104987	0.0602942	0.0609774	0.0771398	0.247332	0.0924422	0.966032	0.0666701	0.0808832	0.0771398	1.39048	0.247332	0.247332	0.247332	0.247332	0.0609774	0.230422	0.0771398	0.156931	0.0771398	0.110881	0.247332	0.0808832	0.247332	0.247332	0.493488	0.247332
petA	0	0	0	0	0.0521452	0	0	0.14479	0.109176	0	0.109068	0	0.052008	0	0	0	0	0.0486467	0.134581	0	0	0	0.134581	0	0.109068	0	0	0	0.0389346
petG	NA	0	0	0	NA	0	NA	0	NA	0	0	0	NA	NA	NA	0	NA	NA	0	0	0	0.223857	0	NA	0	NA	NA	NA	NA
petL	NA	NA	NA	0	0	NA	NA	NA	NA	NA	NA	NA	NA	NA	NA	NA	NA	NA	NA	NA	NA	NA	NA	NA	NA	NA	NA	NA	0
petN	NA	NA	NA	NA	NA	NA	NA	NA	NA	NA	NA	NA	NA	NA	NA	NA	NA	NA	NA	NA	NA	NA	NA	NA	NA	NA	NA	NA	NA
psaA	0.0642261	0.044293	0.0302864	0.0302864	0.0181332	0.0302864	0.0180016	0.028001	0.0288706	0.0543364	0.0202448	0.0293633	0.102923	0.0180016	0.0206897	0.0202204	0.0206897	0.0197028	0.0288907	0.0302864	0.0617104	0.0543364	0.0288907	0.0206897	0.0202448	0.0206897	0.0206897	0.0179788	0.0542778
psaB	0.0566783	0.0728129	0.077232	0.0634725	0.0270575	0.077232	0.0760092	0.0768172	0.0566783	0.0395022	0.0495731	0.077232	0.0240786	0.0542942	0.0309303	0.052564	0.029242	0.0284323	0.045519	0.077232	0.03961	0.03961	0.045519	0.0309303	0.0495731	0.0309303	0.0309303	0.0251239	0.026252
psaC	0	0	0	0	0	0	0	0	0	0	0	0	0	0	0	0	0	0	0	0	0	0	0	0	0	0	0	0	0
psaI	NA	NA	NA	0	NA	NA	NA	0	NA	0	NA	NA	NA	NA	NA	NA	NA	NA	NA	NA	0	0	NA	NA	NA	NA	NA	NA	0
psaJ	NA	0	0	0	0	0	NA	0	NA	NA	NA	0	0	NA	NA	NA	NA	0	NA	0	0.330082	NA	NA	NA	NA	NA	NA	0	NA
psbA	0	0.0374154	0.0427243	0.0427243	0	0.0427243	0	0	0	0	0	0.0374154	0.0375153	0	0	0	0	0	0.0347354	0.0427243	0	0	0.0347354	0	0	0	0	0	0.0330073
psbB	0	0	0	0	0.121353	0	0	0.0657356	0	0.109318	0	0	0.0447076	0	0	0	0	0	0	0	0.109318	0.0743126	0	0	0	0	0	0	0
psbC	0	0	0	0	0	0	0.0453655	0	0	0.109685	0	0	0	0.0453655	0.0416859	0.0385316	0.0453655	0	0.0389102	0	0.048034	0.048034	0	0.0416859	0	0.0453655	0.0453655	0.0359682	0.0497593
psbD	0.0991736	0.0740741	0	0	0.0591133	0	0	0.0740741	0.0740741	0.0991736	0	0	0.0740741	0	0	0.0365854	0.0489796	0.0591133	0	0	0.0991736	0.0991736	0	0	0	0.0591133	0.0591133	0.0365854	0
psbE	0	0	0	0	0	0	0	0	0	0	0	0	0	0	0	0	0	0	0	0	0	0	0	0	0	0	0	0	0
psbF	NA	NA	NA	NA	NA	NA	0	NA	NA	NA	0	NA	NA	0	NA	NA	NA	NA	0	NA	NA	NA	0	NA	0	NA	NA	NA	0
psbH	0	0.334314	0.334314	0.334314	1.02	0.334314	0	0	0	0.334314	0	0.334314	0	0	0	0	0	0	0	0.334314	0.334314	0.334314	0	0	0	0	0	0	0
psbI	NA	NA	NA	NA	NA	NA	NA	NA	NA	NA	0	NA	NA	NA	NA	NA	NA	NA	NA	NA	NA	NA	NA	NA	0	NA	NA	NA	NA
psbJ	0.333051	NA	NA	NA	NA	NA	NA	NA	NA	NA	NA	NA	NA	NA	NA	NA	NA	NA	NA	NA	NA	NA	NA	NA	NA	NA	NA	NA	NA
psbK	NA	NA	NA	NA	0	NA	NA	NA	NA	NA	0	NA	NA	NA	NA	NA	NA	0	NA	NA	0.280958	NA	NA	NA	0	NA	NA	NA	0
psbL	NA	NA	NA	NA	0	NA	0	NA	NA	NA	0	NA	NA	0	0	0	0	0	NA	NA	NA	NA	NA	0	0	0	0	0	0
psbM	NA	NA	NA	NA	NA	NA	NA	NA	NA	NA	0.240613	NA	NA	NA	NA	NA	NA	NA	NA	NA	NA	NA	NA	NA	0.240613	NA	NA	NA	NA
psbN	NA	NA	NA	0	0	NA	0	NA	NA	NA	0	NA	NA	0	0	0	0	0	NA	NA	NA	NA	NA	0	0	0	0	0	0
psbT	0	0	0	0	0	0	0	0	0	0	0	0	0	0	0	0	0	0	0	0	0	0	0	0	0	0	0	0	0
psbZ	0.33106	0.33106	0.33106	0.33106	0.194312	0.33106	0.194312	0.33106	0.33106	0.33106	0.194312	0.33106	0.33106	0.194312	0.194312	0.194312	0.194312	0.194312	0.33106	0.33106	0.33106	0.194312	0.33106	0.194312	0.194312	0.194312	0.194312	0.194312	0.194312
rbcL	0.374185	0.237042	0.225899	0.222673	0.231491	0.237042	0.309206	0.284265	0.517879	0.40693	0.345084	0.286783	0.436372	0.309206	0.249325	0.249325	0.38101	0.201921	0.595169	0.211387	0.36196	0.394261	0.595169	0.249325	0.345084	0.32639	0.32639	0.233941	0.635907
rpl14	0	0	0	0.144496	0	0.144496	0	0	0.0652727	0	0.230823	0	0	0	0	0	0	0	0.106552	0.144496	0	0	0.106552	0	0.230823	0	0	0	0
rpl16	0	0	0	0	0.1825	0	0	0	0	0	NA	0	0	0	0	0	0	0.13212	0	0	0.312952	0.312952	0	0	NA	0	0	0	0
rpl2	0	NA	NA	NA	0	NA	NA	NA	0	NA	0	NA	0	NA	NA	NA	NA	NA	NA	NA	NA	NA	NA	NA	0.449699	NA	NA	0	0
rpl20	0.452046	0.459062	0.459062	0.330357	0.387798	0.459062	0.196344	0.458271	0.179626	0.459062	0.387798	0.459062	0.179626	0.196344	0.451757	0.512631	0.515368	0.387798	0.198908	0.459062	0.398399	0.330357	0.198908	0.451757	0.387798	0.515368	0.515368	0.453236	0.441786
rpl22	1.80182	0.441456	0.343084	0.401265	0.950087	0.401265	0.812848	0.554457	1.80182	0.441456	1.32463	0.401265	1.02775	0.812848	1.00023	0.693992	1.00023	1.28164	0.378033	0.401265	0.303874	0.303874	0.378033	1.00023	1.32463	1.00023	1.00023	0.738672	0.914552
rpl23	0	NA	NA	NA	NA	NA	1.11959	NA	0	NA	NA	NA	0	1.11959	1.11959	1.11959	1.11959	NA	NA	NA	NA	NA	NA	1.11959	NA	1.11959	1.11959	1.11959	NA
rpl32	0	0	0	NA	0.297912	NA	NA	0	0	NA	NA	NA	0	NA	NA	NA	0.458788	0.297912	NA	NA	NA	NA	NA	NA	NA	0.458788	0.458788	NA	0
rpl33	#VALUE!	0.282511	0.564444	0.282511	0.283784	0.282511	0	0.868778	0	0.282511	0.139381	0.282511	0	0	0	0	0	0.283784	0.428571	0.282511	0.572072	0.281596	0.428571	0	0.139381	0	0	0	0.289593
rpl36	0	0	0	0	0	0	0	0	0	0	0	0	0	0	0	0	0	0	0	0	0	0	0	0	0	0	0	0	0
rpoA	0.575513	0.130412	0.0942174	0.126264	0.35587	0.0979874	0.141599	0.169333	0.142116	0.094068	0.472005	0.0942174	0.131815	0.141599	0.285208	0.283929	0.284551	0.739264	0.170146	0.0979874	0.164963	0.094068	0.170146	0.285208	0.472005	0.209121	0.209121	0.170729	0.285693
rpoB	0.194598	0.18499	0.1848	0.289906	0.18202	0.171794	0.19969	0.117465	0.177068	0.106256	0.187116	0.131248	0.180557	0.19969	0.201813	0.212131	0.166191	0.187618	0.210241	0.171794	0.159335	0.159265	0.210241	0.201813	0.197542	0.166191	0.166191	0.178243	0.12626
rpoC1	0.0833237	0.0838606	0.153503	0.10788	0.123925	0.202781	0.125506	0.237581	0.043638	0.0754827	0.0493834	0.153061	0.043638	0.0876801	0.0876801	0.104844	0.0876801	0.0893341	0.0834132	0.18389	0.0755098	0.0755098	0.102694	0.0876801	0.0493834	0.0642617	0.0642617	0.135918	0.225158
rpoC2	0.180375	0.233531	0.255098	0.229139	0.276372	0.219433	0.235592	0.218674	0.15353	0.236126	0.282992	0.205503	0.170587	0.235689	0.257348	0.251988	0.262602	0.288552	0.258	0.228124	0.252188	0.226076	0.258	0.257348	0.282992	0.282488	0.282488	0.229235	0.223872
rps11	NA	0.573985	0.573985	0.573985	0.357564	0.573985	0.353951	0.573985	NA	0.353001	0.17223	0.2508	NA	0.353951	0.471083	0.71052	0.351942	0.251772	0.412311	0.573985	0.353001	0.353001	0.412311	0.471083	0.17223	0.351942	0.351942	0.71052	0.573985
rps12	NA	NA	NA	NA	NA	NA	NA	NA	0.352467	NA	NA	NA	0.352467	NA	NA	NA	NA	NA	NA	NA	NA	NA	NA	NA	NA	NA	NA	NA	NA
rps14	NA	NA	NA	NA	NA	NA	NA	NA	0	0.435788	0	NA	NA	NA	NA	NA	NA	NA	NA	NA	0	0	NA	NA	0	NA	NA	0.216031	NA
rps15	0.191411	0.0951163	0.0951163	0.0951163	0.0469578	0.0951163	0.204269	0.0951163	0.0951163	0.0951163	0.125803	0.0951163	0.0951163	0.0979916	0.0632075	0.0632075	0.0632075	0.0632075	0.0951163	0.0951163	0.0951163	0.0951163	0.0951163	0.0632075	0.125803	0.0632075	0.0632075	0.0632075	0.0370098
rps16	NA	0	0	0.56395	0.445458	0	0.447584	0	NA	0	0	0	NA	0.447584	0	0	0	0.796648	0	0	0	0	0	0	0	0	0	0	NA
rps18	0	0	0	0	0	0	0	0	0	0	0.106194	0	0	0	0	0	0	0	0	0	0	0	0	0	0.106194	0	0	0	0.807185
rps19	NA	0	0	0	NA	0	0.41528	0	NA	0	NA	0	NA	0.41528	0.41528	0.101414	0.206483	0.282125	0	0	0	0	0	0.41528	NA	0.206483	0.206483	0.206483	0.288278
rps2	0	0.222245	0	0	0.186634	0	0.445265	0	NA	0	0.220592	0	NA	0.445265	NA	0.428786	0.222972	0.219704	0.306538	0	0	0	0.306538	NA	0.220592	0.222972	0.222972	NA	0
rps3	0	0	0.0944567	0.0699721	0.132283	0	0.114969	0	0	0	0.13113	0	0	0.114969	0.122614	0.122614	0.14705	0.13113	0	0	0.0777107	0	0	0.122614	0.13113	0.14705	0.14705	0.114969	0.151592
rps4	NA	NA	NA	NA	0.106075	NA	0.0618094	NA	0.321567	NA	0.106075	NA	0.197393	0.0618094	0.114879	0.114879	0.316463	0.0869032	0.792223	NA	NA	NA	0.792223	0.114879	0.106075	0.316463	0.316463	0.0631994	0
rps7	NA	NA	NA	NA	0	NA	0	NA	NA	NA	0	NA	NA	0	0	0	0	0	NA	NA	NA	NA	NA	0	0	0	0	0	0
rps8	0.257831	0.192149	0.154294	0.190711	0.182628	0.154294	0.310535	0.154294	0.247393	0.154294	0.229253	0.144006	0.247393	0.258124	0.184385	0.184385	0.144163	0.182628	0.144006	0.154294	0.154294	0.154294	0.144006	0.184385	0.229253	0.144163	0.144163	0.184385	0.242913
ycf1	0.87569	0.776122	0.647221	0.78466	0.683268	0.762985	0.69121	0.642889	0.818249	0.624318	0.652112	0.665605	0.84393	0.683045	0.79852	0.687246	0.767502	0.695757	0.726959	0.764697	0.730585	0.700789	0.749951	0.80406	0.653374	0.7789	0.7789	0.705982	0.782488
ycf2	0.792288	0.679566	0.679566	0.69519	0.699349	0.679566	0.717615	0.694937	0.782752	0.857096	0.929175	0.679566	0.618404	0.717615	0.721988	0.872033	0.717968	0.877541	0.694868	0.679566	0.61496	0.521667	0.62176	0.721988	0.628987	0.666565	0.666565	0.893576	1.92
ycf3	0	0	0	0	0.201325	0	0	0	0	0	0.201325	0	0	0	0	0	0	0.201325	0	0	0	0	0	0	0.201325	0	0	0	0
ycf4	0.0591133	0.0591133	0.0592593	0.0743034	0.0418118	0.0743034	0.0418118	0.0591133	0.0591133	0.145511	0.0591133	0.0743034	0.0995851	0.0363636	0.0418118	0.0817391	0.0489796	0.0489796	0.0591133	0.0743034	0.115764	0.115764	0.0591133	0.0418118	0.0591133	0.0489796	0.0489796	0.0418118	0.0489796

## Sheet: Sheet2
																													Hibiscus_r	Hibiscus_c	5.00	140.17	0.0365	4.00	444.83	0.009
Hibiscus_r	Hibiscus_c	4.00	139.67	0.0292	5.00	445.33	0.0113
Hibiscus_r	Hibiscus_h	3.00	140	0.0217	5.00	445	0.0113
Hibiscus_r	Hibiscus_m	3.00	139.67	0.0218	5.00	445.33	0.0113
Hibiscus_r	Hibiscus_m	3.00	139.67	0.0218	5.00	445.33	0.0113
Hibiscus_r	Hibiscus_t	2.00	139.67	0.0145	5.00	445.33	0.0113
Hibiscus_r	Hibiscus_t	2.00	140	0.0144	5.00	445	0.0113
Hibiscus_r	Hibiscus_a	3.00	140.17	0.0217	2.00	444.83	0.0045
Hibiscus_r	Hibiscus_b	2.00	140.5	0.0144	1.00	444.5	0.0023
Hibiscus_r	Hibiscus_b	2.00	140.5	0.0144	1.00	444.5	0.0023
Hibiscus_r	Hibiscus_c	2.00	140.5	0.0144	1.00	444.5	0.0023
Hibiscus_r	Hibiscus_c	2.00	140.5	0.0144	1.00	444.5	0.0023
Hibiscus_r	Hibiscus_d	2.00	140.5	0.0144	1.00	444.5	0.0023
Hibiscus_r	Hibiscus_f	4.00	140.25	0.0291	2.00	444.75	0.0045
Hibiscus_r	Hibiscus_g	1.00	140.5	0.0072	1.00	444.5	0.0023
Hibiscus_r	Hibiscus_l	2.00	140.5	0.0144	1.00	444.5	0.0023
Hibiscus_r	Hibiscus_m	2.00	140.17	0.0144	2.00	444.83	0.0045
Hibiscus_r	Hibiscus_p	2.00	139.67	0.0145	5.00	445.33	0.0113
Hibiscus_r	Hibiscus_r	2.00	139.67	0.0145	5.00	445.33	0.0113
Hibiscus_r	Hibiscus_s	3.00	139.83	0.0218	4.00	445.17	0.009
Hibiscus_r	Hibiscus_s	2.00	140.5	0.0144	1.00	444.5	0.0023
Hibiscus_r	Hibiscus_s	2.00	140.5	0.0144	1.00	444.5	0.0023
Hibiscus_r	Hibiscus_s	1.00	140.5	0.0072	1.00	444.5	0.0023
Hibiscus_r	Hibiscus_s	1.00	140.5	0.0072	1.00	444.5	0.0023
Hibiscus_r	Hibiscus_s	2.00	140.5	0.0144	1.00	444.5	0.0023				0.009	0.0113	0.0113	0.0113	0.0113	0.0113	0.0113	0.0045	0.0023	0.0023	0.0023	0.0023	0.0023	0.0045	0.0023	0.0023	0.0045	0.0113	0.0113	0.009	0.0023	0.0023	0.0023	0.0023	0.0023	0.0113	0.0113	0.009	0.009
Hibiscus_r	Hibiscus_t	2.00	139.67	0.0145	5.00	445.33	0.0113
Hibiscus_r	Hibiscus_t	2.00	139.67	0.0145	5.00	445.33	0.0113
Hibiscus_r	Hibiscus_v	2.00	139.83	0.0144	4.00	445.17	0.009
Hibiscus_r	Hibiscus_v	4.00	140	0.0291	4.00	445	0.009
						clpP
Hibiscus_r	Hibiscus_a	3.00	140.17	0.0217	2.00	444.83	0.0045	0.207373	0.207373	0.207373	0.159722	0.159722	0.159722	0.246575	0.159722	0.386986	0.159722	0.154639	0.319444	0.520737	0.159722	0.3125	0.518349	0.518349	0.77931	0.77931	0.412844	0.159722	0.159722	0.319444	0.319444	0.159722	0.77931	0.784722	0.77931	0.77931	0.625	0.309278
Hibiscus_r	Hibiscus_b	2.00	140.5	0.0144	1.00	444.5	0.0023	0.159722	0.159722
Hibiscus_r	Hibiscus_b	2.00	140.5	0.0144	1.00	444.5	0.0023	0.159722	0.159722	0.0045	0.0023	0.0023	0.0023	0.009	0.0023	0.0113	0.0023	0.0045	0.0023	0.0113	0.0023	0.0045	0.0113	0.0113	0.0113	0.0113	0.009	0.0023	0.0023	0.0023	0.0023	0.0023	0.0113	0.0113	0.0113	0.0113	0.009	0.009
Hibiscus_r	Hibiscus_c	2.00	140.5	0.0144	1.00	444.5	0.0023	0.159722	0.159722
Hibiscus_r	Hibiscus_c	5.00	140.17	0.0365	4.00	444.83	0.009	0.246575	0.246575
Hibiscus_r	Hibiscus_c	2.00	140.5	0.0144	1.00	444.5	0.0023	0.159722	0.159722
Hibiscus_r	Hibiscus_c	4.00	139.67	0.0292	5.00	445.33	0.0113	0.386986	0.386986
Hibiscus_r	Hibiscus_d	2.00	140.5	0.0144	1.00	444.5	0.0023	0.159722	0.159722
Hibiscus_r	Hibiscus_f	4.00	140.25	0.0291	2.00	444.75	0.0045	0.154639	0.154639
Hibiscus_r	Hibiscus_g	1.00	140.5	0.0072	1.00	444.5	0.0023	0.319444	0.319444
Hibiscus_r	Hibiscus_h	3.00	140	0.0217	5.00	445	0.0113	0.520737	0.520737
Hibiscus_r	Hibiscus_l	2.00	140.5	0.0144	1.00	444.5	0.0023	0.159722	0.159722
Hibiscus_r	Hibiscus_m	2.00	140.17	0.0144	2.00	444.83	0.0045	0.3125	0.3125
Hibiscus_r	Hibiscus_m	3.00	139.67	0.0218	5.00	445.33	0.0113	0.518349	0.518349
Hibiscus_r	Hibiscus_m	3.00	139.67	0.0218	5.00	445.33	0.0113	0.518349	0.518349
Hibiscus_r	Hibiscus_p	2.00	139.67	0.0145	5.00	445.33	0.0113	0.77931	0.77931
Hibiscus_r	Hibiscus_r	2.00	139.67	0.0145	5.00	445.33	0.0113	0.77931	0.77931
Hibiscus_r	Hibiscus_s	3.00	139.83	0.0218	4.00	445.17	0.009	0.412844	0.412844
Hibiscus_r	Hibiscus_s	2.00	140.5	0.0144	1.00	444.5	0.0023	0.159722	0.159722
Hibiscus_r	Hibiscus_s	2.00	140.5	0.0144	1.00	444.5	0.0023	0.159722	0.159722
Hibiscus_r	Hibiscus_s	1.00	140.5	0.0072	1.00	444.5	0.0023	0.319444	0.319444
Hibiscus_r	Hibiscus_s	1.00	140.5	0.0072	1.00	444.5	0.0023	0.319444	0.319444
Hibiscus_r	Hibiscus_s	2.00	140.5	0.0144	1.00	444.5	0.0023	0.159722	0.159722
Hibiscus_r	Hibiscus_t	2.00	139.67	0.0145	5.00	445.33	0.0113	0.77931	0.77931
Hibiscus_r	Hibiscus_t	2.00	140	0.0144	5.00	445	0.0113	0.784722	0.784722
Hibiscus_r	Hibiscus_t	2.00	139.67	0.0145	5.00	445.33	0.0113	0.77931	0.77931
Hibiscus_r	Hibiscus_t	2.00	139.67	0.0145	5.00	445.33	0.0113	0.77931	0.77931
Hibiscus_r	Hibiscus_v	2.00	139.83	0.0144	4.00	445.17	0.009	0.625	0.625
Hibiscus_r	Hibiscus_v	4.00	140	0.0291	4.00	445	0.009	0.309278	0.309278
	ndhD
Hibiscus_r	Hibiscus_a	6.00	341.67	0.0178	6.00	1053.33	0.0057	0.320225	0.320225	0.320225	0.162921	0.139423	0.320225	0.158996	0.213483	0.141791	0.200837	0.385135	0.159664	0.162921	0.159664	0.378531	0.107807	0.0794979	0.141264	0.0575758	0.141264	0.230769	0.213483	0.141264	0.107807	0.230769	0.0794979	0.162921	0.0575758	0.0575758	0.070632	0.160535
Hibiscus_r	Hibiscus_b	6.00	340.67	0.0178	3.00	1054.33	0.0029	0.162921	0.162921
Hibiscus_r	Hibiscus_b	7.00	340.67	0.0208	3.00	1054.33	0.0029	0.139423	0.139423
Hibiscus_r	Hibiscus_c	6.00	340.17	0.0178	6.00	1054.83	0.0057	0.320225	0.320225
Hibiscus_r	Hibiscus_c	8.00	340	0.0239	4.00	1055	0.0038	0.158996	0.158996
Hibiscus_r	Hibiscus_c	6.00	340.5	0.0178	4.00	1054.5	0.0038	0.213483	0.213483
Hibiscus_r	Hibiscus_c	9.00	341.33	0.0268	4.00	1053.67	0.0038	0.141791	0.141791
Hibiscus_r	Hibiscus_d	8.00	340.67	0.0239	5.00	1054.33	0.0048	0.200837	0.200837
Hibiscus_r	Hibiscus_f	5.00	341.67	0.0148	6.00	1053.33	0.0057	0.385135	0.385135
Hibiscus_r	Hibiscus_g	8.00	341	0.0238	4.00	1054	0.0038	0.159664	0.159664
Hibiscus_r	Hibiscus_h	6.00	340.5	0.0178	3.00	1054.5	0.0029	0.162921	0.162921
Hibiscus_r	Hibiscus_l	8.00	340.92	0.0238	4.00	1054.08	0.0038	0.159664	0.159664
Hibiscus_r	Hibiscus_m	6.00	342.17	0.0177	7.00	1052.83	0.0067	0.378531	0.378531
Hibiscus_r	Hibiscus_m	9.00	341	0.0269	3.00	1054	0.0029	0.107807	0.107807
Hibiscus_r	Hibiscus_m	8.00	340.67	0.0239	2.00	1054.33	0.0019	0.0794979	0.0794979
Hibiscus_r	Hibiscus_p	9.00	340.17	0.0269	4.00	1054.83	0.0038	0.141264	0.141264
Hibiscus_r	Hibiscus_r	11.00	340.5	0.033	2.00	1054.5	0.0019	0.0575758	0.0575758
Hibiscus_r	Hibiscus_s	9.00	340	0.0269	4.00	1055	0.0038	0.141264	0.141264
Hibiscus_r	Hibiscus_s	7.00	340.67	0.0208	5.00	1054.33	0.0048	0.230769	0.230769
Hibiscus_r	Hibiscus_s	6.00	340.5	0.0178	4.00	1054.5	0.0038	0.213483	0.213483
Hibiscus_r	Hibiscus_s	9.00	340.33	0.0269	4.00	1054.67	0.0038	0.141264	0.141264
Hibiscus_r	Hibiscus_s	9.00	340.67	0.0269	3.00	1054.33	0.0029	0.107807	0.107807
Hibiscus_r	Hibiscus_s	7.00	340.67	0.0208	5.00	1054.33	0.0048	0.230769	0.230769
Hibiscus_r	Hibiscus_t	8.00	340.67	0.0239	2.00	1054.33	0.0019	0.0794979	0.0794979
Hibiscus_r	Hibiscus_t	6.00	340.5	0.0178	3.00	1054.5	0.0029	0.162921	0.162921	0.0057	0.0029	0.0029	0.0057	0.0038	0.0038	0.0038	0.0048	0.0057	0.0038	0.0029	0.0038	0.0067	0.0029	0.0019	0.0038	0.0019	0.0038	0.0048	0.0038	0.0038	0.0029	0.0048	0.0019	0.0029	0.0019	0.0019	0.0019	0.0048
Hibiscus_r	Hibiscus_t	11.00	340.5	0.033	2.00	1054.5	0.0019	0.0575758	0.0575758
Hibiscus_r	Hibiscus_t	11.00	340.5	0.033	2.00	1054.5	0.0019	0.0575758	0.0575758
Hibiscus_r	Hibiscus_v	9.00	340.67	0.0269	2.00	1054.33	0.0019	0.070632	0.070632
Hibiscus_r	Hibiscus_v	10.00	340.92	0.0299	5.00	1054.08	0.0048	0.160535	0.160535
	ndhF
Hibiscus_r	Hibiscus_a	14.00	499.67	0.0286	19.00	1684.33	0.0114	0.398601	0.398601	0.398601	0.475472	0.461538	0.540984	0.328512	0.45283	0.329114	0.565574	0.292683	0.516393	0.34642	0.538117	0.372549	0.329114	0.35122	0.329114	0.339394	0.303797	0.442105	0.491803	0.40367	0.366972	0.463158	0.35122	0.364964	0.341772	0.341772	0.341772	0.40367
Hibiscus_r	Hibiscus_b	13.00	499.92	0.0265	21.00	1684.08	0.0126	0.475472	0.475472
Hibiscus_r	Hibiscus_b	14.00	499.75	0.0286	22.00	1684.25	0.0132	0.461538	0.461538
Hibiscus_r	Hibiscus_c	12.00	500.08	0.0244	22.00	1683.92	0.0132	0.540984	0.540984
Hibiscus_r	Hibiscus_c	23.50	501.42	0.0484	26.50	1682.58	0.0159	0.328512	0.328512
Hibiscus_r	Hibiscus_c	13.00	500.08	0.0265	20.00	1683.92	0.012	0.45283	0.45283
Hibiscus_r	Hibiscus_c	23.00	501	0.0474	26.00	1683	0.0156	0.329114	0.329114
Hibiscus_r	Hibiscus_d	12.00	499.83	0.0244	23.00	1684.17	0.0138	0.565574	0.565574
Hibiscus_r	Hibiscus_f	18.00	499.67	0.0369	18.00	1684.33	0.0108	0.292683	0.292683
Hibiscus_r	Hibiscus_g	12.00	500.25	0.0244	21.00	1683.75	0.0126	0.516393	0.516393
Hibiscus_r	Hibiscus_h	21.00	499.67	0.0433	25.00	1684.33	0.015	0.34642	0.34642
Hibiscus_r	Hibiscus_l	11.00	499.92	0.0223	20.00	1684.08	0.012	0.538117	0.538117
Hibiscus_r	Hibiscus_m	15.00	499.83	0.0306	19.00	1684.17	0.0114	0.372549	0.372549
Hibiscus_r	Hibiscus_m	23.00	501	0.0474	26.00	1683	0.0156	0.329114	0.329114
Hibiscus_r	Hibiscus_m	20.00	500.83	0.041	24.00	1683.17	0.0144	0.35122	0.35122
Hibiscus_r	Hibiscus_p	23.00	500.67	0.0474	26.00	1683.33	0.0156	0.329114	0.329114
Hibiscus_r	Hibiscus_r	24.00	500.58	0.0495	28.00	1683.42	0.0168	0.339394	0.339394
Hibiscus_r	Hibiscus_s	23.00	500.58	0.0474	24.00	1683.42	0.0144	0.303797	0.303797
Hibiscus_r	Hibiscus_s	14.00	500.75	0.0285	21.00	1683.25	0.0126	0.442105	0.442105
Hibiscus_r	Hibiscus_s	12.00	500.08	0.0244	20.00	1683.92	0.012	0.491803	0.491803
Hibiscus_r	Hibiscus_s	16.00	500.08	0.0327	22.00	1683.92	0.0132	0.40367	0.40367
Hibiscus_r	Hibiscus_s	16.00	500.25	0.0327	20.00	1683.75	0.012	0.366972	0.366972
Hibiscus_r	Hibiscus_s	14.00	500.92	0.0285	22.00	1683.08	0.0132	0.463158	0.463158	0.0114	0.0126	0.0132	0.0132	0.0159	0.012	0.0156	0.0138	0.0108	0.0126	0.015	0.012	0.0114	0.0156	0.0144	0.0156	0.0168	0.0144	0.0126	0.012	0.0132	0.012	0.0132	0.0144	0.015	0.0162	0.0162	0.0162	0.0132
Hibiscus_r	Hibiscus_t	20.00	500.83	0.041	24.00	1683.17	0.0144	0.35122	0.35122
Hibiscus_r	Hibiscus_t	20.00	499.67	0.0411	25.00	1684.33	0.015	0.364964	0.364964
Hibiscus_r	Hibiscus_t	23.00	500.5	0.0474	27.00	1683.5	0.0162	0.341772	0.341772
Hibiscus_r	Hibiscus_t	23.00	500.5	0.0474	27.00	1683.5	0.0162	0.341772	0.341772
Hibiscus_r	Hibiscus_v	23.00	500.67	0.0474	27.00	1683.33	0.0162	0.341772	0.341772
Hibiscus_r	Hibiscus_v	16.00	500.75	0.0327	22.00	1683.25	0.0132	0.40367	0.40367
	psbD
Hibiscus_r	Hibiscus_a	3.00	249.33	0.0121	1.00	809.67	0.0012	0.0991736	0.0991736	0.0991736	0.0740741	0	0	0.0591133	0	0	0.0740741	0.0740741	0.0991736	0	0	0.0740741	0	0	0.0365854	0.0489796	0.0591133	0	0	0.0991736	0.0991736	0	0	0	0.0591133	0.0591133	0.0365854	0
Hibiscus_r	Hibiscus_b	4.00	249.33	0.0162	1.00	809.67	0.0012	0.0740741	0.0740741
Hibiscus_r	Hibiscus_b	3.00	249.17	0.0121	0.00	809.83	0	0	0
Hibiscus_r	Hibiscus_c	4.00	249.17	0.0162	0.00	809.83	0	0	0
Hibiscus_r	Hibiscus_c	5.00	249.17	0.0203	1.00	809.83	0.0012	0.0591133	0.0591133
Hibiscus_r	Hibiscus_c	3.00	249.17	0.0121	0.00	809.83	0	0	0
Hibiscus_r	Hibiscus_c	10.00	249.17	0.0412	0.00	809.83	0	0	0
Hibiscus_r	Hibiscus_d	4.00	249.33	0.0162	1.00	809.67	0.0012	0.0740741	0.0740741
Hibiscus_r	Hibiscus_f	4.00	249.17	0.0162	1.00	809.83	0.0012	0.0740741	0.0740741
Hibiscus_r	Hibiscus_g	3.00	249.17	0.0121	1.00	809.83	0.0012	0.0991736	0.0991736
Hibiscus_r	Hibiscus_h	6.00	249.17	0.0245	0.00	809.83	0	0	0
Hibiscus_r	Hibiscus_l	3.00	249.17	0.0121	0.00	809.83	0	0	0
Hibiscus_r	Hibiscus_m	4.00	249.17	0.0162	1.00	809.83	0.0012	0.0740741	0.0740741
Hibiscus_r	Hibiscus_m	9.00	249.17	0.037	0.00	809.83	0	0	0
Hibiscus_r	Hibiscus_m	9.00	249.17	0.037	0.00	809.83	0	0	0
Hibiscus_r	Hibiscus_p	8.00	249.17	0.0328	1.00	809.83	0.0012	0.0365854	0.0365854
Hibiscus_r	Hibiscus_r	6.00	249.33	0.0245	1.00	809.67	0.0012	0.0489796	0.0489796
Hibiscus_r	Hibiscus_s	5.00	249.17	0.0203	1.00	809.83	0.0012	0.0591133	0.0591133
Hibiscus_r	Hibiscus_s	5.00	249.17	0.0203	0.00	809.83	0	0	0
Hibiscus_r	Hibiscus_s	3.00	249.17	0.0121	0.00	809.83	0	0	0
Hibiscus_r	Hibiscus_s	3.00	249.17	0.0121	1.00	809.83	0.0012	0.0991736	0.0991736
Hibiscus_r	Hibiscus_s	3.00	249.17	0.0121	1.00	809.83	0.0012	0.0991736	0.0991736	0.0012	0.0012	0	0	0.0012	0	0	0.0012	0.0012	0.0012	0	0	0.0012	0	0	0.0012	0.0012	0.0012	0	0	0.0012	0.0012	0	0	0	0.0012	0.0012	0.0012	0
Hibiscus_r	Hibiscus_s	5.00	249.17	0.0203	0.00	809.83	0	0	0
Hibiscus_r	Hibiscus_t	9.00	249.17	0.037	0.00	809.83	0	0	0
Hibiscus_r	Hibiscus_t	6.00	249.17	0.0245	0.00	809.83	0	0	0
Hibiscus_r	Hibiscus_t	5.00	249.33	0.0203	1.00	809.67	0.0012	0.0591133	0.0591133
Hibiscus_r	Hibiscus_t	5.00	249.33	0.0203	1.00	809.67	0.0012	0.0591133	0.0591133
Hibiscus_r	Hibiscus_v	8.00	249.33	0.0328	1.00	809.67	0.0012	0.0365854	0.0365854
Hibiscus_r	Hibiscus_v	6.00	248.83	0.0245	0.00	810.17	0	0	0
Hibiscus_r	Hibiscus_a	5.00	126.58	0.0406	1.00	425.42	0.0024	0.0591133	0.0591133	0.0591133	0.0591133	0.0592593	0.0743034	0.0418118	0.0743034	0.0418118	0.0591133	0.0591133	0.145511	0.0591133	0.0743034	0.0995851	0.0363636	0.0418118	0.0817391	0.0489796	0.0489796	0.0591133	0.0743034	0.115764	0.115764	0.0591133	0.0418118	0.0591133	0.0489796	0.0489796	0.0418118	0.0489796	0	0	0	0	0	0	0	0	0.1	0	0
Hibiscus_r	Hibiscus_b	5.00	126.58	0.0406	1.00	425.42	0.0024	0.0591133	0.0591133
Hibiscus_r	Hibiscus_b	5.00	126.75	0.0405	1.00	425.25	0.0024	0.0592593	0.0592593
Hibiscus_r	Hibiscus_c	4.00	126.58	0.0323	1.00	425.42	0.0024	0.0743034	0.0743034
Hibiscus_r	Hibiscus_c	7.00	126.58	0.0574	1.00	425.42	0.0024	0.0418118	0.0418118
Hibiscus_r	Hibiscus_c	4.00	126.58	0.0323	1.00	425.42	0.0024	0.0743034	0.0743034
Hibiscus_r	Hibiscus_c	7.00	126.58	0.0574	1.00	425.42	0.0024	0.0418118	0.0418118
Hibiscus_r	Hibiscus_d	5.00	126.58	0.0406	1.00	425.42	0.0024	0.0591133	0.0591133
Hibiscus_r	Hibiscus_f	5.00	126.58	0.0406	1.00	425.42	0.0024	0.0591133	0.0591133
Hibiscus_r	Hibiscus_g	4.00	126.58	0.0323	2.00	425.42	0.0047	0.145511	0.145511
Hibiscus_r	Hibiscus_h	5.00	126.58	0.0406	1.00	425.42	0.0024	0.0591133	0.0591133
Hibiscus_r	Hibiscus_l	4.00	126.58	0.0323	1.00	425.42	0.0024	0.0743034	0.0743034
Hibiscus_r	Hibiscus_m	3.00	126.33	0.0241	1.00	425.67	0.0024	0.0995851	0.0995851
Hibiscus_r	Hibiscus_m	8.00	126.58	0.066	1.00	425.42	0.0024	0.0363636	0.0363636
Hibiscus_r	Hibiscus_m	7.00	126.58	0.0574	1.00	425.42	0.0024	0.0418118	0.0418118
Hibiscus_r	Hibiscus_p	7.00	126.42	0.0575	2.00	425.58	0.0047	0.0817391	0.0817391
Hibiscus_r	Hibiscus_r	6.00	126.58	0.049	1.00	425.42	0.0024	0.0489796	0.0489796
Hibiscus_r	Hibiscus_s	6.00	126.58	0.049	1.00	425.42	0.0024	0.0489796	0.0489796
Hibiscus_r	Hibiscus_s	5.00	126.58	0.0406	1.00	425.42	0.0024	0.0591133	0.0591133
Hibiscus_r	Hibiscus_s	4.00	126.58	0.0323	1.00	425.42	0.0024	0.0743034	0.0743034
Hibiscus_r	Hibiscus_s	5.00	126.58	0.0406	2.00	425.42	0.0047	0.115764	0.115764
Hibiscus_r	Hibiscus_s	5.00	126.58	0.0406	2.00	425.42	0.0047	0.115764	0.115764
Hibiscus_r	Hibiscus_s	5.00	126.58	0.0406	1.00	425.42	0.0024	0.0591133	0.0591133
Hibiscus_r	Hibiscus_t	7.00	126.58	0.0574	1.00	425.42	0.0024	0.0418118	0.0418118
Hibiscus_r	Hibiscus_t	5.00	126.58	0.0406	1.00	425.42	0.0024	0.0591133	0.0591133
Hibiscus_r	Hibiscus_t	6.00	126.58	0.049	1.00	425.42	0.0024	0.0489796	0.0489796
Hibiscus_r	Hibiscus_t	6.00	126.58	0.049	1.00	425.42	0.0024	0.0489796	0.0489796
Hibiscus_r	Hibiscus_v	7.00	126.58	0.0574	1.00	425.42	0.0024	0.0418118	0.0418118
Hibiscus_r	Hibiscus_v	6.00	126.58	0.049	1.00	425.42	0.0024	0.0489796	0.0489796
Hibiscus_a	Hibiscus_b	4.00	126.83	0.0322	0.00	425.17	0	0	0
Hibiscus_a	Hibiscus_b	4.00	127	0.0322	0.00	425	0	0	0
Hibiscus_a	Hibiscus_c	3.00	126.83	0.024	0.00	425.17	0	0	0
Hibiscus_a	Hibiscus_c	6.00	126.83	0.0489	0.00	425.17	0	0	0
Hibiscus_a	Hibiscus_c	3.00	126.83	0.024	0.00	425.17	0	0	0
Hibiscus_a	Hibiscus_c	6.00	126.83	0.0489	0.00	425.17	0	0	0
Hibiscus_a	Hibiscus_d	4.00	126.83	0.0322	0.00	425.17	0	0	0
Hibiscus_a	Hibiscus_f	2.00	126.83	0.0159	0.00	425.17	0	0	0
Hibiscus_a	Hibiscus_g	3.00	126.83	0.024	1.00	425.17	0.0024	0.1	0.1
Hibiscus_a	Hibiscus_h	4.00	126.83	0.0322	0.00	425.17	0	0	0
Hibiscus_a	Hibiscus_l	3.00	126.83	0.024	0.00	425.17	0	0	0
Hibiscus_a	Hibiscus_m	2.00	126.58	0.016	0.00	425.42	0	0	0
Hibiscus_a	Hibiscus_m	6.00	126.83	0.0489	0.00	425.17	0	0	0
Hibiscus_a	Hibiscus_m	6.00	126.83	0.0489	0.00	425.17	0	0	0
Hibiscus_a	Hibiscus_p	6.00	126.67	0.0489	1.00	425.33	0.0024	0.0490798	0.0490798
Hibiscus_a	Hibiscus_r	7.00	126.83	0.0573	0.00	425.17	0	0	0
Hibiscus_a	Hibiscus_s	5.00	126.83	0.0405	0.00	425.17	0	0	0
Hibiscus_a	Hibiscus_s	3.00	126.83	0.024	0.00	425.17	0	0	0
Hibiscus_a	Hibiscus_s	3.00	126.83	0.024	0.00	425.17	0	0	0
Hibiscus_a	Hibiscus_s	4.00	126.83	0.0322	1.00	425.17	0.0024	0.0745342	0.0745342	0.0024	0.0024	0.0024	0.0024	0.0024	0.0024	0.0024	0.0024	0.0047	0.0024	0.0024	0.0024	0.0024	0.0024	0.0047	0.0024	0.0024	0.0024	0.0024	0.0047	0.0047	0.0024	0.0024	0.0024	0.0024	0.0024	0.0024	0.0024	0	0	0	0	0	0	0	0	0.0024	0	0	0
Hibiscus_a	Hibiscus_s	4.00	126.83	0.0322	1.00	425.17	0.0024	0.0745342	0.0745342
Hibiscus_a	Hibiscus_s	3.00	126.83	0.024	0.00	425.17	0	0	0
Hibiscus_a	Hibiscus_t	6.00	126.83	0.0489	0.00	425.17	0	0	0
Hibiscus_a	Hibiscus_t	4.00	126.83	0.0322	0.00	425.17	0	0	0
Hibiscus_a	Hibiscus_t	7.00	126.83	0.0573	0.00	425.17	0	0	0
Hibiscus_a	Hibiscus_t	7.00	126.83	0.0573	0.00	425.17	0	0	0
Hibiscus_a	Hibiscus_v	6.00	126.83	0.0489	0.00	425.17	0	0	0
Hibiscus_a	Hibiscus_v	5.00	126.83	0.0405	0.00	425.17	0	0	0
	rpl33#
Hibiscus_r	Hibiscus_a	1.00	45.67	0.0222	0.00	158.33	0	#VALUE!		#VALUE!	#VALUE!	0.282511	0.564444	0.282511	0.283784	0.282511	0	0.868778	0	0.282511	0.139381	0.282511	0	0	0	0	0	0.283784	0.428571	0.282511	0.572072	0.281596	0.428571	0	0.139381	0	0	0	0.289593
Hibiscus_r	Hibiscus_b	1.00	45.50	0.0223	1.00	158.5	0.0063	0.282511		0.282511
Hibiscus_r	Hibiscus_b	1.00	45.17	0.0225	2.00	158.83	0.0127	0.564444		0.564444
Hibiscus_r	Hibiscus_c	1.00	45.50	0.0223	1.00	158.5	0.0063	0.282511		0.282511
Hibiscus_r	Hibiscus_c	1.00	45.67	0.0222	1.00	158.33	0.0063	0.283784		0.283784
Hibiscus_r	Hibiscus_c	1.00	45.50	0.0223	1.00	158.5	0.0063	0.282511		0.282511
Hibiscus_r	Hibiscus_c	2.00	45.67	0.0451	0.00	158.33	0	0		0
Hibiscus_r	Hibiscus_d	1.00	46.00	0.0221	3.00	158	0.0192	0.868778	0	0.868778	0.0127	0.0063	0.0063	0.0063	0	0.0192	0	0.0063	0.0063	0.0063	0	0	0	0	0	0.0063	0.0192	0.0063	0.0127	0.0127	0.0192	0	0.0063	0	0	0	0.0064
Hibiscus_r	Hibiscus_f	1.00	45.67	0.0222	0.00	158.33	0	0		0
Hibiscus_r	Hibiscus_g	1.00	45.50	0.0223	1.00	158.5	0.0063	0.282511		0.282511
Hibiscus_r	Hibiscus_h	2.00	45.58	0.0452	1.00	158.42	0.0063	0.139381		0.139381
Hibiscus_r	Hibiscus_l	1.00	45.50	0.0223	1.00	158.5	0.0063	0.282511		0.282511
Hibiscus_r	Hibiscus_m	1.00	45.67	0.0222	0.00	158.33	0	0		0
Hibiscus_r	Hibiscus_m	2.00	45.67	0.0451	0.00	158.33	0	0		0
Hibiscus_r	Hibiscus_m	1.00	45.67	0.0222	0.00	158.33	0	0		0
Hibiscus_r	Hibiscus_p	1.00	45.67	0.0222	0.00	158.33	0	0		0
Hibiscus_r	Hibiscus_r	1.00	45.67	0.0222	0.00	158.33	0	0		0
Hibiscus_r	Hibiscus_s	1.00	45.67	0.0222	1.00	158.33	0.0063	0.283784		0.283784
Hibiscus_r	Hibiscus_s	2.00	46.00	0.0448	3.00	158	0.0192	0.428571		0.428571
Hibiscus_r	Hibiscus_s	1.00	45.50	0.0223	1.00	158.5	0.0063	0.282511		0.282511
Hibiscus_r	Hibiscus_s	1.00	45.67	0.0222	2.00	158.33	0.0127	0.572072		0.572072
Hibiscus_r	Hibiscus_s	2.00	45.67	0.0451	2.00	158.33	0.0127	0.281596		0.281596
Hibiscus_r	Hibiscus_s	2.00	46.00	0.0448	3.00	158	0.0192	0.428571		0.428571
Hibiscus_r	Hibiscus_t	1.00	45.67	0.0222	0.00	158.33	0	0		0
Hibiscus_r	Hibiscus_t	2.00	45.58	0.0452	1.00	158.42	0.0063	0.139381		0.139381
Hibiscus_r	Hibiscus_t	1.00	45.67	0.0222	0.00	158.33	0	0		0
Hibiscus_r	Hibiscus_t	1.00	45.67	0.0222	0.00	158.33	0	0		0
Hibiscus_r	Hibiscus_v	1.00	45.67	0.0222	0.00	158.33	0	0		0
Hibiscus_r	Hibiscus_v	1.00	46.00	0.0221	1.00	158	0.0064	0.289593		0.289593
	ycf2
1511.58	0.0015	15.67	5355.42	0.0029	1.93333
	ndhK
Hibiscus_r	Hibiscus_a	1.00	163	0.0062	2.00	503	0.004	0.645161
Hibiscus_r	Hibiscus_b	6.00	162.75	0.0378	2.00	503.25	0.004	0.10582
Hibiscus_r	Hibiscus_b	7.00	163.33	0.0441	2.00	502.67	0.004	0.0907029
Hibiscus_r	Hibiscus_c	8.00	163.33	0.0507	1.00	502.67	0.002	0.0394477
Hibiscus_r	Hibiscus_c	4.00	163	0.025	1.00	503	0.002	0.08
Hibiscus_r	Hibiscus_c	6.00	163	0.0377	1.00	503	0.002	0.0530504
Hibiscus_r	Hibiscus_c	1.00	163	0.0062	1.00	503	0.002	0.322581
Hibiscus_r	Hibiscus_d	5.00	163	0.0313	1.00	503	0.002	0.0638978
Hibiscus_r	Hibiscus_f	1.00	163	0.0062	3.00	503	0.006	0.967742
Hibiscus_r	Hibiscus_g	7.00	163	0.0442	1.00	503	0.002	0.0452489
Hibiscus_r	Hibiscus_h	3.00	163	0.0186	1.00	503	0.002	0.107527
Hibiscus_r	Hibiscus_l	6.00	163	0.0377	1.00	503	0.002	0.0530504
Hibiscus_r	Hibiscus_m	1.00	163	0.0062	4.00	503	0.008	1.29032
Hibiscus_r	Hibiscus_m	1.00	163	0.0062	1.00	503	0.002	0.322581
Hibiscus_r	Hibiscus_m	1.00	163	0.0062	1.00	503	0.002	0.322581
Hibiscus_r	Hibiscus_p	1.00	163	0.0062	1.00	503	0.002	0.322581
Hibiscus_r	Hibiscus_r	1.00	163	0.0062	1.00	503	0.002	0.322581
Hibiscus_r	Hibiscus_s	4.00	163	0.025	1.00	503	0.002	0.08
Hibiscus_r	Hibiscus_s	4.00	162.75	0.025	2.00	503.25	0.004	0.16					1.02762
Hibiscus_r	Hibiscus_s	6.00	163	0.0377	1.00	503	0.002	0.0530504
Hibiscus_r	Hibiscus_s	6.00	162.42	0.0379	2.00	503.58	0.004	0.105541
Hibiscus_r	Hibiscus_s	6.00	163	0.0377	1.00	503	0.002	0.0530504
Hibiscus_r	Hibiscus_s	4.00	163	0.025	1.00	503	0.002	0.08
Hibiscus_r	Hibiscus_t	1.00	163	0.0062	1.00	503	0.002	0.322581
Hibiscus_r	Hibiscus_t	3.00	163	0.0186	1.00	503	0.002	0.107527
Hibiscus_r	Hibiscus_t	1.00	163	0.0062	1.00	503	0.002	0.322581
Hibiscus_r	Hibiscus_t	1.00	163	0.0062	1.00	503	0.002	0.322581
Hibiscus_r	Hibiscus_v	1.00	162.5	0.0062	2.00	503.5	0.004	0.645161
Hibiscus_r	Hibiscus_v	1.00	163	0.0062	1.00	503	0.002	0.322581
Hibiscus_r	Hibiscus_a	1.00	109.42	0.0092	8.00	343.58	0.0237	2.57609
Hibiscus_r	Hibiscus_b	3.00	108.75	0.0281	6.00	344.25	0.0176	0.626335
Hibiscus_r	Hibiscus_b	4.00	108.75	0.0377	5.00	344.25	0.0147	0.38992
Hibiscus_r	Hibiscus_c	3.00	108.75	0.0281	5.00	344.25	0.0147	0.523132
Hibiscus_r	Hibiscus_c	3.00	110.25	0.0277	13.00	342.75	0.0389	1.40433
Hibiscus_r	Hibiscus_c	3.00	108.75	0.0281	5.00	344.25	0.0147	0.523132
Hibiscus_r	Hibiscus_c	4.00	110.25	0.0372	15.00	342.75	0.0451	1.21237
Hibiscus_r	Hibiscus_d	3.00	108.92	0.0281	6.00	344.08	0.0176	0.626335
Hibiscus_r	Hibiscus_f	1.00	109.42	0.0092	8.00	343.58	0.0237	2.57609
Hibiscus_r	Hibiscus_g	3.00	108.75	0.0281	6.00	344.25	0.0176	0.626335
Hibiscus_r	Hibiscus_h	2.00	110	0.0184	14.00	343	0.042	2.28261
Hibiscus_r	Hibiscus_l	3.00	108.75	0.0281	5.00	344.25	0.0147	0.523132
Hibiscus_r	Hibiscus_m	2.00	109.42	0.0185	8.00	343.58	0.0237	1.28108
Hibiscus_r	Hibiscus_m	4.00	110.25	0.0372	15.00	342.75	0.0451	1.21237
Hibiscus_r	Hibiscus_m	3.00	110.25	0.0277	15.00	342.75	0.0451	1.62816
Hibiscus_r	Hibiscus_p	5.00	110.33	0.0467	15.00	342.67	0.0451	0.965739
Hibiscus_r	Hibiscus_r	3.00	110.25	0.0277	15.00	342.75	0.0451	1.62816
Hibiscus_r	Hibiscus_s	2.00	110.25	0.0184	13.00	342.75	0.0389	2.11413
Hibiscus_r	Hibiscus_s	4.00	109.08	0.0376	6.00	343.92	0.0177	0.470745
Hibiscus_r	Hibiscus_s	3.00	108.75	0.0281	5.00	344.25	0.0147	0.523132
Hibiscus_r	Hibiscus_s	4.00	108.75	0.0377	6.00	344.25	0.0176	0.466844
Hibiscus_r	Hibiscus_s	4.00	108.75	0.0377	6.00	344.25	0.0176	0.466844
Hibiscus_r	Hibiscus_s	4.00	109.08	0.0376	6.00	343.92	0.0177	0.470745
Hibiscus_r	Hibiscus_t	3.00	110.25	0.0277	15.00	342.75	0.0451	1.62816
Hibiscus_r	Hibiscus_t	2.00	110	0.0184	14.00	343	0.042	2.28261
Hibiscus_r	Hibiscus_t	3.00	110.25	0.0277	15.00	342.75	0.0451	1.62816
Hibiscus_r	Hibiscus_t	3.00	110.25	0.0277	15.00	342.75	0.0451	1.62816
Hibiscus_r	Hibiscus_v	4.50	110.08	0.042	16.50	342.92	0.0497	1.18333
Hibiscus_r	Hibiscus_v	5.00	108.42	0.0476	15.00	344.58	0.0448	0.941176
Hibiscus_r	Hibiscus_a	2.00	114.5	0.0177	2.00	386.5	0.0052	0.293785	0.293785	0.293785	0.590909	0.295455	0.886364	0.194757	0.590909	0.0973783	0.590909	0.295455	0.590909	0.145658	0.590909	0.590909	0.0973783	0.147727	0.147727	0.0579065	0.145658	0.590909	0.590909	0.886364	0.886364	0.590909	0.147727	0.145658	0.0728291	0.0728291	0.147727	0.0728291
Hibiscus_r	Hibiscus_b	1.00	114.83	0.0088	2.00	386.17	0.0052	0.590909	0.590909
Hibiscus_r	Hibiscus_b	2.00	114.83	0.0176	2.00	386.17	0.0052	0.295455	0.295455
Hibiscus_r	Hibiscus_c	1.00	114.5	0.0088	3.00	386.5	0.0078	0.886364	0.886364
Hibiscus_r	Hibiscus_c	3.00	114.5	0.0267	2.00	386.5	0.0052	0.194757	0.194757
Hibiscus_r	Hibiscus_c	1.00	114.83	0.0088	2.00	386.17	0.0052	0.590909	0.590909
Hibiscus_r	Hibiscus_c	3.00	114.33	0.0267	1.00	386.67	0.0026	0.0973783	0.0973783
Hibiscus_r	Hibiscus_d	1.00	114.83	0.0088	2.00	386.17	0.0052	0.590909	0.590909
Hibiscus_r	Hibiscus_f	1.00	114.67	0.0088	1.00	386.33	0.0026	0.295455	0.295455
Hibiscus_r	Hibiscus_g	1.00	114.83	0.0088	2.00	386.17	0.0052	0.590909	0.590909
Hibiscus_r	Hibiscus_h	4.00	114.83	0.0357	2.00	386.17	0.0052	0.145658	0.145658
Hibiscus_r	Hibiscus_l	1.00	114.83	0.0088	2.00	386.17	0.0052	0.590909	0.590909
Hibiscus_r	Hibiscus_m	1.00	114.83	0.0088	2.00	386.17	0.0052	0.590909	0.590909
Hibiscus_r	Hibiscus_m	3.00	114.33	0.0267	1.00	386.67	0.0026	0.0973783	0.0973783
Hibiscus_r	Hibiscus_m	2.00	114.67	0.0176	1.00	386.33	0.0026	0.147727	0.147727
Hibiscus_r	Hibiscus_p	2.00	114.67	0.0176	1.00	386.33	0.0026	0.147727	0.147727
Hibiscus_r	Hibiscus_r	5.00	114.67	0.0449	1.00	386.33	0.0026	0.0579065	0.0579065
Hibiscus_r	Hibiscus_s	4.00	114.83	0.0357	2.00	386.17	0.0052	0.145658	0.145658
Hibiscus_r	Hibiscus_s	1.00	114.83	0.0088	2.00	386.17	0.0052	0.590909	0.590909
Hibiscus_r	Hibiscus_s	1.00	114.83	0.0088	2.00	386.17	0.0052	0.590909	0.590909
Hibiscus_r	Hibiscus_s	1.00	114.5	0.0088	3.00	386.5	0.0078	0.886364	0.886364
Hibiscus_r	Hibiscus_s	1.00	114.5	0.0088	3.00	386.5	0.0078	0.886364	0.886364
Hibiscus_r	Hibiscus_s	1.00	114.83	0.0088	2.00	386.17	0.0052	0.590909	0.590909
Hibiscus_r	Hibiscus_t	2.00	114.67	0.0176	1.00	386.33	0.0026	0.147727	0.147727
Hibiscus_r	Hibiscus_t	4.00	114.83	0.0357	2.00	386.17	0.0052	0.145658	0.145658
Hibiscus_r	Hibiscus_t	4.00	114.67	0.0357	1.00	386.33	0.0026	0.0728291	0.0728291
Hibiscus_r	Hibiscus_t	4.00	114.67	0.0357	1.00	386.33	0.0026	0.0728291	0.0728291
Hibiscus_r	Hibiscus_v	2.00	114.67	0.0176	1.00	386.33	0.0026	0.147727	0.147727
Hibiscus_r	Hibiscus_v	4.00	114.83	0.0357	1.00	386.17	0.0026	0.0728291	0.0728291
[truncated: 17 more columns]
