# Supplementary material for: Comparative chloroplast genomics of Hibiscus (Hibisceae, Malvoideae, Malvaceae) and its phylogenetic implications
Source: Research Square preprint supplement (doi:10.21203/rs.3.rs-7085489/v1), 2025-09-05
Supplement: Supplementary file 6 [file d8e745f339d09128cc0d5734.xlsx]

## Sheet: Sheet1
Table S4. Amino acid frequency analysis of Hibiscus species
Amino Acid	Hibiscus aponeurus	Hibiscus brachysiphonius	Hibiscus burtonii	Hibiscus campanulatus	Hibiscus cannabinus	Hibiscus coatesii	Hibiscus coccineus	Hibiscus denudatus	Hibiscus fuscus	Hibiscus goldsworthii	Hibiscus hamabo	Hibiscus leptocladus	Hibiscus micranthus	Hibiscus moscheutos	Hibiscus mutabilis	Hibiscus panduriformis	Hibiscus richardsonii	Hibiscus rosa-sinensis	Hibiscus sabdariffa	Hibiscus sinosyriacus	Hibiscus sp. Gardneri	Hibiscus sturtii var. campylochlamys	Hibiscus sturtii var. platychlamys	Hibiscus syriacus	Hibiscus taiwanensis	Hibiscus tiliaceus	Hibiscus tridactylites	Hibiscus trionum	Hibiscus verdcourtii	Hibiscus volkensii
L	10.585	10.5265	10.5209	10.5506	10.5817	10.5382	10.5855	10.5468	10.5547	10.5406	10.5668	10.5199	10.5605	10.5904	10.5731	10.5736	10.5667	10.5038	10.5434	10.5515	10.5374	10.539	10.5534	10.5549	10.5852	10.5951	10.5573	10.5486	10.5691	10.5424
I	8.57121	8.61746	8.62431	8.61463	8.63383	8.62214	8.59166	8.607	8.5936	8.59739	8.60367	8.61516	8.57613	8.59062	8.60667	8.61707	8.5976	8.5735	8.62398	8.62155	8.6253	8.58844	8.59924	8.63406	8.60404	8.66978	8.60687	8.59632	8.59333	8.61727
S	7.74963	7.71639	7.72372	7.70964	7.71137	7.72137	7.71144	7.71346	7.72965	7.71933	7.70022	7.7067	7.73113	7.70522	7.71698	7.7267	7.70464	7.74023	7.68908	7.71965	7.72078	7.7067	7.69466	7.71757	7.71844	7.68961	7.71756	7.72522	7.71607	7.71199
G	6.94333	6.90313	6.90708	6.90011	6.9185	6.90076	6.93838	6.9192	6.94981	6.90234	6.9302	6.90129	6.95496	6.93814	6.94185	6.95097	6.94524	6.93754	6.92208	6.91711	6.89642	6.92038	6.92366	6.91946	6.94736	6.94671	6.9542	6.95347	6.93035	6.91749
R	6.095	6.08224	6.07136	6.0753	6.10277	6.08397	6.09261	6.09058	6.11262	6.10063	6.08394	6.08062	6.11379	6.08327	6.07507	6.06443	6.06373	6.09663	6.08639	6.08018	6.08732	6.07298	6.08779	6.07553	6.07703	6.01711	6.05344	6.05563	6.08742	6.06952
F	5.67465	5.6737	5.67831	5.67054	5.6301	5.67176	5.65251	5.6629	5.66918	5.67687	5.64175	5.67982	5.67791	5.66347	5.67032	5.66319	5.65923	5.71439	5.67809	5.64834	5.67132	5.67219	5.66412	5.65166	5.65332	5.57371	5.66794	5.66211	5.6793	5.68373
A	5.43391	5.45225	5.45697	5.46815	5.4052	5.46947	5.40375	5.46052	5.42452	5.45927	5.40922	5.46607	5.43703	5.3887	5.39158	5.4148	5.39592	5.45448	5.43005	5.45726	5.46905	5.45843	5.46947	5.45309	5.39375	5.45702	5.38931	5.39467	5.39324	5.43163
K	5.35366	5.34153	5.33486	5.33832	5.28703	5.33588	5.35017	5.31541	5.35189	5.33328	5.33679	5.33629	5.34909	5.34672	5.34194	5.33456	5.36539	5.32452	5.29268	5.35025	5.32784	5.35155	5.35115	5.34998	5.34412	5.34033	5.35878	5.3641	5.35129	5.29412
V	5.33073	5.35298	5.34631	5.36123	5.35946	5.34351	5.34252	5.36505	5.34042	5.36001	5.33298	5.35919	5.34526	5.33527	5.35721	5.35366	5.34631	5.32834	5.35755	5.35789	5.34692	5.363	5.34733	5.35762	5.35558	5.39868	5.34351	5.345	5.33603	5.35141
E	5.18552	5.20408	5.20893	5.21613	5.20317	5.21756	5.22005	5.20086	5.20662	5.19203	5.21099	5.22559	5.21526	5.22459	5.21975	5.20845	5.23183	5.20985	5.20873	5.19739	5.21716	5.21032	5.21374	5.1896	5.22197	5.18475	5.23282	5.23802	5.21016	5.21772
T	5.02885	5.05517	5.04102	5.0443	5.05451	5.04198	5.08228	5.05575	5.03842	5.05077	5.06995	5.03855	5.02791	5.09102	5.06701	5.07089	5.09063	5.04166	5.05609	5.04834	5.0416	5.05	5.04198	5.05594	5.06165	5.09529	5.08779	5.08138	5.07285	5.05348
N	4.84543	4.86045	4.86167	4.86482	4.90585	4.8626	4.85649	4.86482	4.83199	4.85989	4.89079	4.86678	4.84056	4.85059	4.86846	4.87218	4.88075	4.86584	4.90727	4.84962	4.86604	4.88205	4.87405	4.84973	4.86315	4.91249	4.87405	4.87507	4.88977	4.87395
P	4.12702	4.15792	4.15188	4.14694	4.12061	4.16412	4.11022	4.14694	4.14389	4.13453	4.10552	4.15299	4.15998	4.11022	4.1086	4.11938	4.10609	4.13195	4.12119	4.1388	4.1638	4.13772	4.13359	4.14328	4.10734	4.06457	4.1145	4.11095	4.10405	4.15202
D	4.10409	4.11592	4.11753	4.11639	4.12823	4.1145	4.12553	4.11257	4.12095	4.1269	4.13601	4.10718	4.11792	4.12548	4.13151	4.11556	4.11753	4.09755	4.11356	4.13116	4.11419	4.09955	4.10687	4.128	4.12261	4.10346	4.11832	4.12241	4.12312	4.11765
Y	3.72196	3.73411	3.73211	3.73453	3.75086	3.71756	3.72752	3.7269	3.71956	3.7375	3.75862	3.73693	3.71263	3.74385	3.73439	3.72578	3.73593	3.71913	3.75105	3.73371	3.71727	3.74456	3.73664	3.73468	3.73325	3.78452	3.73282	3.73653	3.74552	3.7395
Q	3.59968	3.5852	3.5871	3.57797	3.59457	3.57634	3.57444	3.58943	3.57812	3.58479	3.56421	3.58806	3.57498	3.56829	3.56638	3.58439	3.55276	3.60446	3.58696	3.58849	3.57606	3.58043	3.57634	3.58957	3.56529	3.5317	3.55344	3.54932	3.57769	3.59053
H	2.45328	2.43595	2.44228	2.42859	2.44339	2.43893	2.43781	2.43623	2.4504	2.43949	2.42443	2.4353	2.42793	2.43484	2.43232	2.42271	2.42702	2.45394	2.45364	2.43819	2.44256	2.43148	2.43893	2.44014	2.43539	2.42707	2.42748	2.42607	2.41056	2.44461
M	2.32336	2.30232	2.30872	2.3064	2.30617	2.30153	2.29238	2.30258	2.30896	2.30587	2.33675	2.3017	2.30557	2.30508	2.29868	2.28897	2.3049	2.32016	2.30863	2.29296	2.30135	2.30552	2.30534	2.28739	2.30942	2.3415	2.30534	2.30763	2.3152	2.3071
W	1.74252	1.73342	1.74013	1.74126	1.72295	1.73664	1.74512	1.73744	1.74701	1.73322	1.7497	1.74059	1.74352	1.75171	1.75264	1.7387	1.75157	1.73916	1.73243	1.73119	1.73651	1.73677	1.73664	1.7375	1.75211	1.70751	1.75191	1.74601	1.74689	1.74179
C	1.13111	1.14925	1.14482	1.13411	1.13974	1.14122	1.15959	1.14556	1.12772	1.1453	1.14741	1.14131	1.12793	1.15254	1.14552	1.15404	1.15627	1.14288	1.13714	1.14648	1.14113	1.14894	1.14504	1.13033	1.14899	1.15908	1.15267	1.16146	1.14807	1.14209
